# Supplementary material for: Isolation of Unstable Isomers of Lucilactaene and Evaluation of Anti-Inflammatory Activity of Secondary Metabolites Produced by the Endophytic Fungus Fusarium sp. QF001 from the Roots of Scutellaria baicalensis
Source: PubMed Central journal article supplement (PMC7070625; doi:10.3390/molecules25040923), 2020-02-19
Supplement: molecules-25-00923-s001.pdf [file molecules-25-00923-s001.pdf]

Supplementary Materials

# Isolation of Unstable Isomers of Lucilactaene and Evaluation of Anti-inflammatory Activity of Secondary Metabolites Produced by an Endophytic Fungus *Fusarium* sp. QF001 from the Roots of *Scutellaria baicalensis*

Sailesh Maharjan<sup>1</sup>, Sang Bong Lee<sup>2</sup>, Geum Jin Kim<sup>1</sup>, Sung Jin Cho<sup>3</sup>, Joo-Won Nam<sup>1</sup>, Jungwook Chin<sup>3,\*</sup> and Hyukjae Choi<sup>1,\*</sup>

<sup>1</sup> College of Pharmacy, Yeungnam University, Gyeongsan, South Korea; [msaileshmaharjan@gmail.com](mailto:msaileshmaharjan@gmail.com) (S.M.); [kimgeumjin@naver.com](mailto:kimgeumjin@naver.com) (G.J.K.); [jwnam@yu.ac.kr](mailto:jwnam@yu.ac.kr) (J.W.N.)

<sup>2</sup> Korea Institute of Medical Microrobotics, Gwangju, 61011, South Korea; [sangbongyi1@kimiro.re.kr](mailto:sangbongyi1@kimiro.re.kr) (S.B.L.)

<sup>3</sup> New Drug Development Center, Daegu-Gyeongbuk Medical Innovation Foundation, Daegu 41061, South Korea; [sjcho@dgmif.re.kr](mailto:sjcho@dgmif.re.kr) (S.J.C.)

\* Correspondence: [jwchin@dgmif.re.kr](mailto:jwchin@dgmif.re.kr) (J.C.); [h5choil@yu.ac.kr](mailto:h5choil@yu.ac.kr) (H.C.)

## List of Figures

**Figure S1:** Semi-preparative RP HPLC chromatogram of fraction C

**Figure S2:** Chromatographic profiles of C2 and C6 on analytical RP HPLC

**Figure S3:** Chromatogram of isolated compounds (C6a-C6c and C2a-C2c)

**Figure S4:** Time-dependent chromatographic monitoring of C6a-C6c on RP HPLC

**Figure S5:** Time-dependent chromatographic monitoring of C6a-C6c on NP HPLC

**Figure S6:** <sup>1</sup>H NMR spectrum of **1** (250 MHz, CDCl<sub>3</sub>)

**Figure S7:** <sup>13</sup>C NMR spectrum of **1** (63 MHz, CDCl<sub>3</sub>)

**Figure S8:** HR-FAB-MS spectrum of **2**

**Figure S9 :** <sup>1</sup>H NMR spectrum of **2** (600 MHz, CDCl<sub>3</sub>)

**Figure S10 :** <sup>13</sup>C NMR spectrum of **2** (150 MHz, CDCl<sub>3</sub>)

**Figure S11:** COSY spectrum of **2** (600 MHz, CDCl<sub>3</sub>)

**Figure S12:** HMQC spectrum of **2** (600 MHz, CDCl<sub>3</sub>)

**Figure S13:** HMBC spectrum of **2** (600 MHz, CDCl<sub>3</sub>)

**Figure S14:** NOESY spectrum of **2** (600 MHz, CDCl<sub>3</sub>)

**Figure S15:** HR-FAB-MS spectrum of **3**

**Figure S16:** <sup>1</sup>H NMR spectrum of **3** (600 MHz, CDCl<sub>3</sub>)

**Figure S17:** <sup>13</sup>C NMR spectrum of **3** (150 MHz, CDCl<sub>3</sub>)

**Figure S18:** COSY spectrum of **3** (600 MHz, CDCl<sub>3</sub>)

**Figure S19:** HMQC spectrum of **3** (600 MHz, CDCl<sub>3</sub>)

**Figure S20:** HSQC spectrum of **3** (600 MHz, CDCl<sub>3</sub>)

**Figure S21:** HMBC spectrum of **3** (600 MHz, CDCl<sub>3</sub>)

**Figure S22:** NOESY spectrum of **3** (600 MHz, CDCl<sub>3</sub>)

**Figure S23:** <sup>1</sup>H NMR spectrum of **4** (250 MHz, CDCl<sub>3</sub>)

**Figure S24:** HMQC spectrum of **4** (250 MHz, CDCl<sub>3</sub>)

**Figure S25:** HMBC spectrum of **4** (250 MHz, CDCl<sub>3</sub>)

**Figure S26:** <sup>1</sup>H NMR spectrum of **5** (250 MHz, CDCl<sub>3</sub>)

**Figure S27:** <sup>13</sup>C NMR spectrum of **5** (63 MHz, CDCl<sub>3</sub>)

**Figure S28:** <sup>1</sup>H NMR spectrum of **6** (600 MHz, CDCl<sub>3</sub>)

**Figure S29:** <sup>13</sup>C NMR spectrum of **6** (150 MHz, CDCl<sub>3</sub>)

**Figure S30:** NOESY spectra of **6** (600 MHz, CDCl<sub>3</sub>)

**Figure S31:** <sup>1</sup>H NMR spectrum of **7** (250 MHz, CDCl<sub>3</sub>)

**Figure S32:** <sup>1</sup>H NMR spectrum of **8** (250 MHz, CDCl<sub>3</sub>)

**Figure S33:** <sup>13</sup>C NMR spectrum of **8** (63 MHz, CDCl<sub>3</sub>)

**Figure S34:** <sup>1</sup>H NMR spectrum of **9** (250 MHz, CDCl<sub>3</sub>)

**Figure S35:** <sup>13</sup>C NMR spectrum of **9** (63 MHz, CDCl<sub>3</sub>)

**Figure S36:** Effect on cell viability of compounds **1-9**. Cell proliferation in macrophage cell line (RAW264.7) with or without compounds **1-9**

## List of Tables

**Table S1:** NMR spectroscopic data (600/ 150 MHz) of **2** in CDCl<sub>3</sub>

**Table S2:** NMR spectroscopic data (600/ 150 MHz) of **3** in CDCl<sub>3</sub>

**Table S3:** Energy minimization of 13S\*, 14S\*, 15S\* furanopyrrolidone (Case I)

**Table S4:** Energy minimization of three conformers of 13S\*, 14S\*, 15R\* furanopyrrolidone (Case II)

**Table S5:** Energy minimization of 13S\*, 14R\*, 15R\* furanopyrrolidone (Case III)

**Table S6:** Energy minimization of 13S\*, 14R\*, 15S\* furanopyrrolidone (Case IV)

**Table S7:** Optical rotation calculation of *R*-solaniol

**Table S8:** Optical rotation calculation of *S*-solaniol

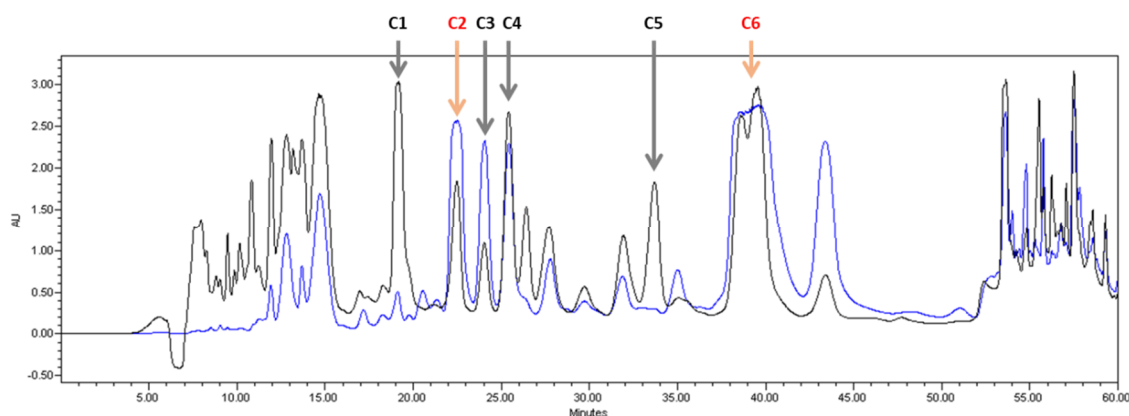

**Figure S1:** Semi-preparative RP HPLC chromatogram of fraction C [Phenomenex Luna C18, 250 × 10 mm, 5 μm, 2.0 mL/min, mobile phase: A (0.05% formic acid in H<sub>2</sub>O), B (0.05% formic acid in acetonitrile), gradient elution: B 44% (0 to 45 min), B 44 to 100% (45 to 50 min), B 100% (50 to 60 min)]

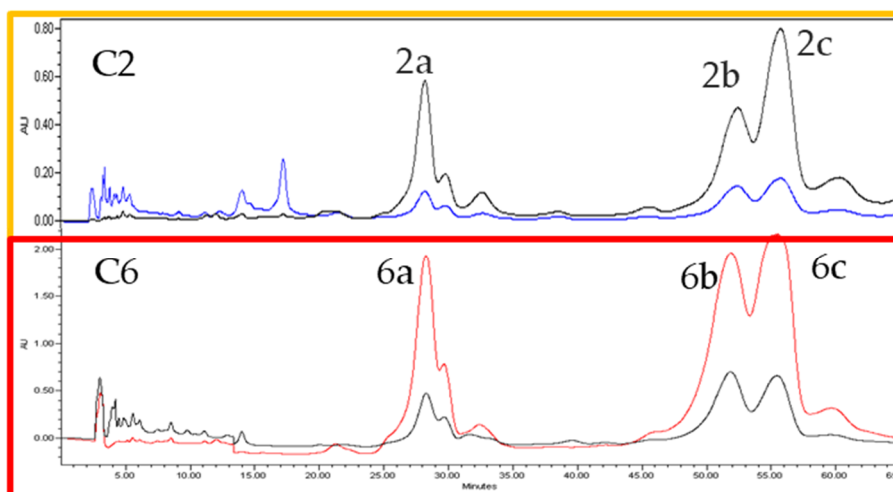

**Figure S2:** Chromatographic profiles of C2 and C6 on semi-preparative RP HPLC [Phenomenex Luna C18, 250 × 10 mm, 5 μm, 2.0 mL/min, mobile phase: A (0.05% formic acid in H<sub>2</sub>O), B (0.05% formic acid in acetonitrile), gradient elution: B 44% (0 to 45 min), B 44 to 100% (45 to 50 min), B 100% (50 to 60 min)]

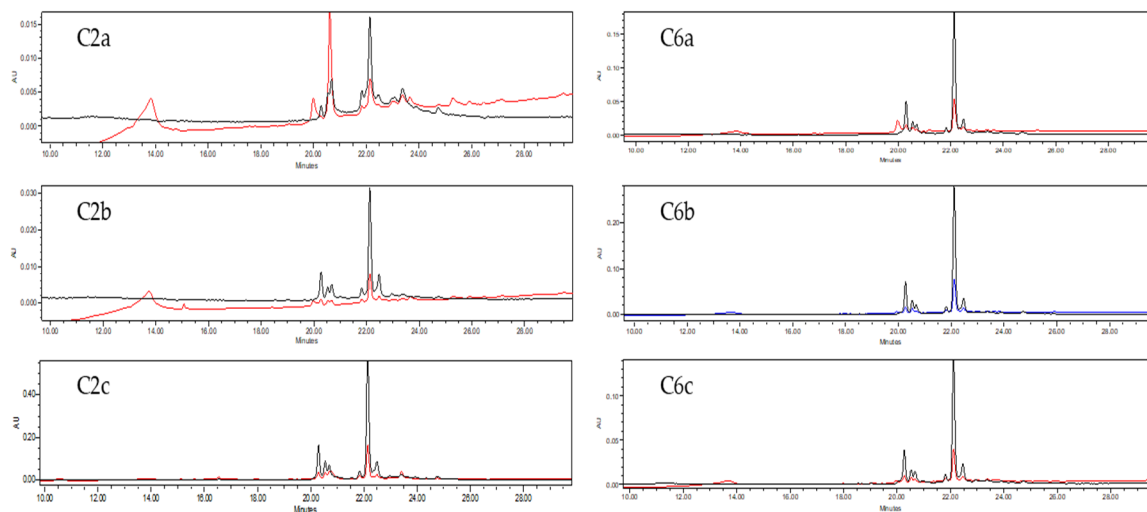

**Figure S3:** Analytical HPLC chromatogram of isolated compounds (C2a-C2c and C6a-C6c) [Phenomenex Kinetex C18 column, 250 × 4.6 mm, 5 μm, 0.8 mL/min, isocratic elution (H<sub>2</sub>O: acetonitrile = 69:31), PDA monitoring at 210 and 365 nm]



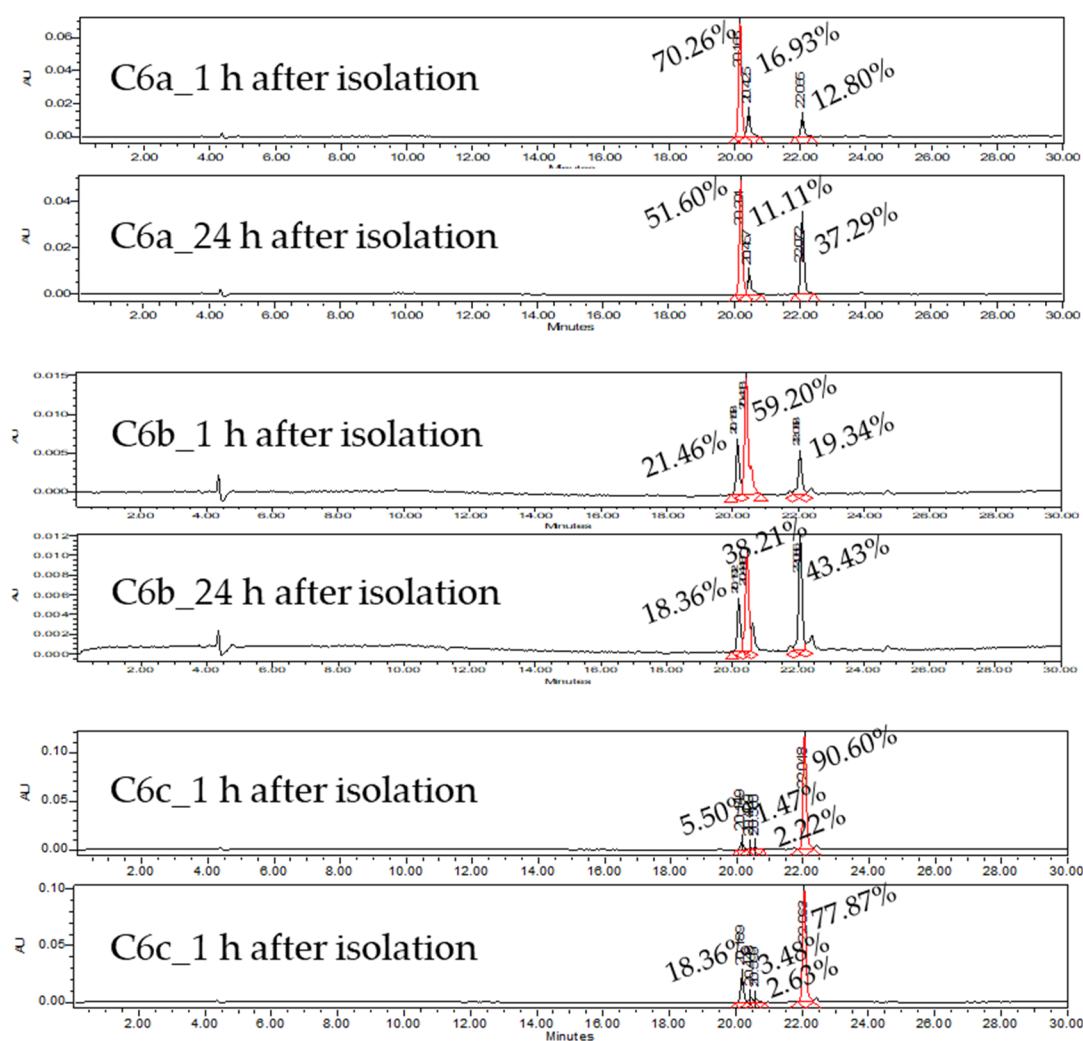

**Figure S4:** Time-dependent chromatographic monitoring of C6a-C6c on RP HPLC [Phenomenex Kinetex C18 column, 250 × 4.6 mm, 5 μm, 0.8 mL/min, isocratic elution (H<sub>2</sub>O:acetonitrile = 69:31), PDA monitoring at 210 and 365 nm]

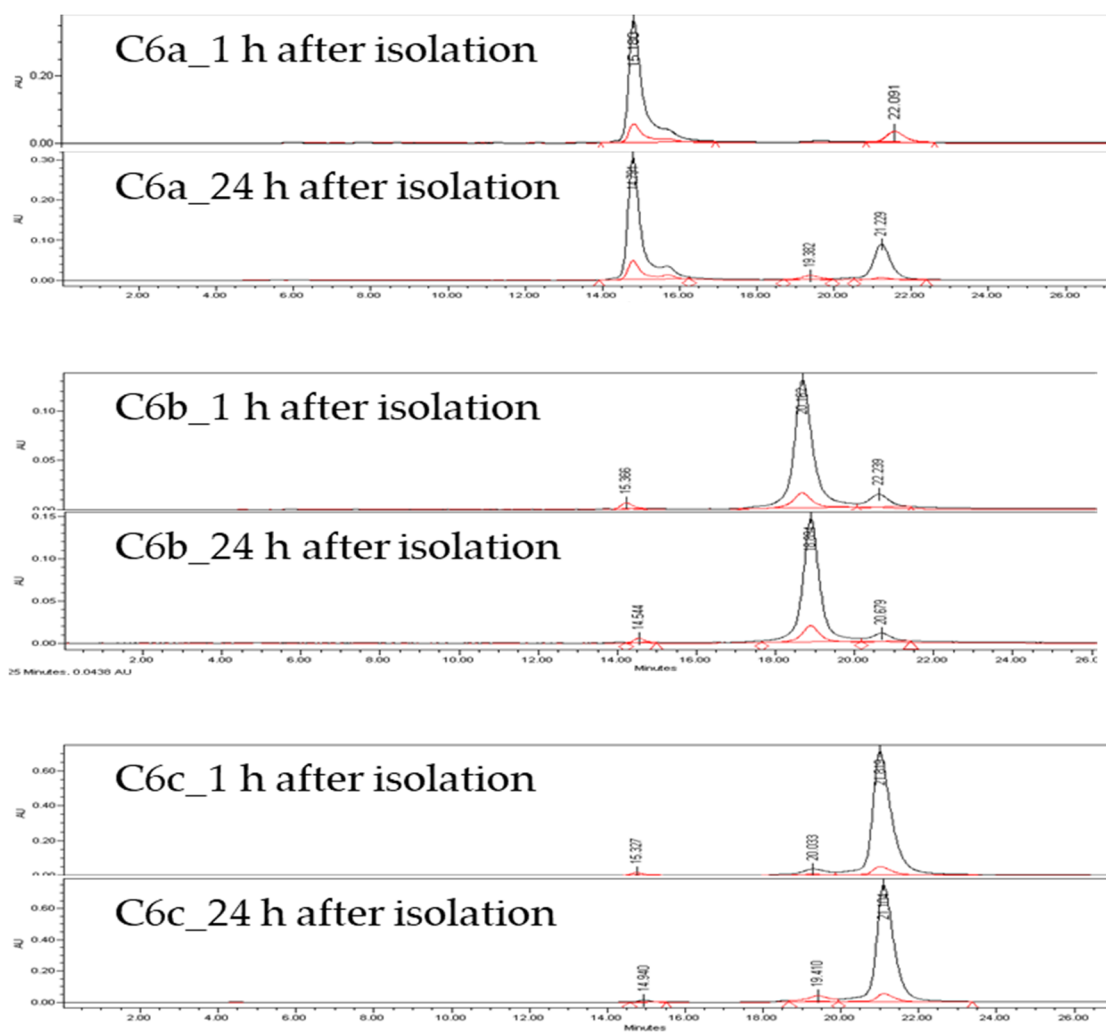

**Figure S5:** Time-dependent chromatographic monitoring of C6a-C6c on NP HPLC [Inertsil Sil column, 250 × 4.6 mm, 5 μm, 0.7 mL/min, 1-hexane:ethyl acetate = 40:60), PDA monitoring at 210 and 365 nm]

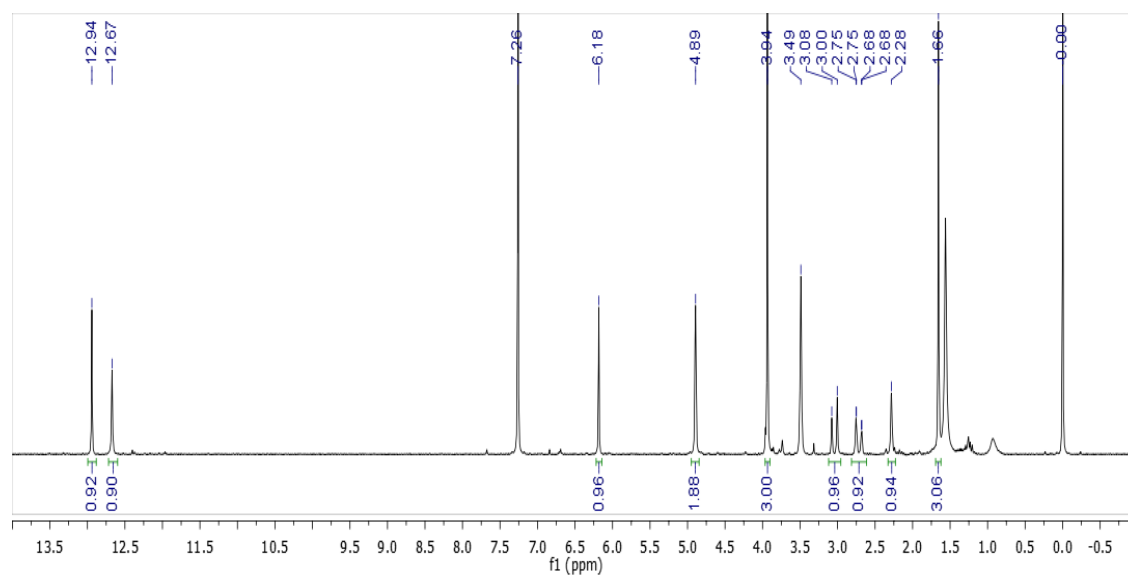

**Figure S6:** <sup>1</sup>H NMR spectrum of **1** (250 MHz, CDCl<sub>3</sub>)

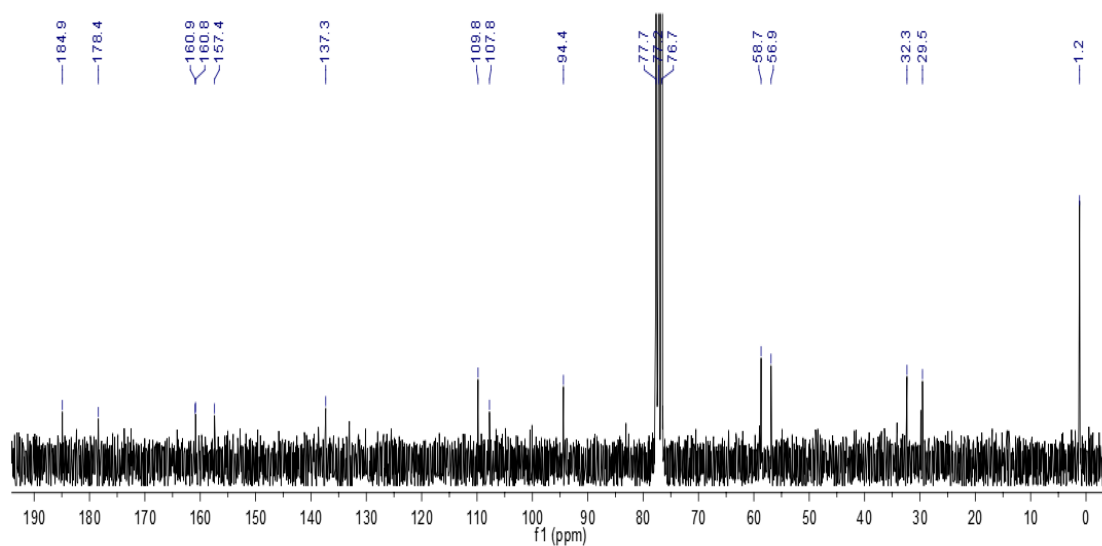

**Figure S7:** <sup>13</sup>C NMR spectrum of **1** (63 MHz, CDCl<sub>3</sub>)

[ Elemental Composition ]  
 Date : 18-Jul-2018 17:09  
 Data : FAB-R082  
 Sample: QFIC(NP)\_Pk2  
 Note : m-NBA  
 Inlet : Direct Ion Mode : FAB+  
 RT : 4.52 min Scan#: (200,219)  
 Elements : C 100/0, H 100/0, N 10/0, O 10/0  
 Mass Tolerance : 20ppm, 5mmu if m/z < 250, 10mmu if m/z > 500  
 Unsaturation (U.S.) : -0.5 - 50.0

| Observed m/z | Int%  | Err [ppm / mmu] | U.S. | Composition        |
|--------------|-------|-----------------|------|--------------------|
| 402.1921     | 100.0 | -12.3 / -4.9    | 18.5 | C 28 H 24 N 3      |
|              |       | +19.0 / +7.6    | 19.0 | C 27 H 22 N 4      |
|              |       | -15.6 / -6.3    | 18.0 | C 30 H 26 O        |
|              |       | +15.6 / +6.3    | 18.5 | C 29 H 24 N O      |
|              |       | +1.0 / +0.4     | 15.0 | C 21 H 22 N 8 O    |
|              |       | -2.3 / -0.9     | 14.5 | C 23 H 24 N 5 O 2  |
|              |       | -5.6 / -2.3     | 14.0 | C 25 H 26 N 2 O 3  |
|              |       | +11.0 / +4.4    | 11.0 | C 16 H 22 N 10 O 3 |
|              |       | +7.7 / +3.1     | 10.5 | C 18 H 24 N 7 O 4  |
|              |       | +4.4 / +1.8     | 10.0 | C 20 H 26 N 4 O 5  |
|              |       | +1.0 / +0.4     | 9.5  | C 22 H 28 N O 6    |
|              |       | -13.6 / -5.5    | 6.0  | C 14 H 26 N 8 O 6  |
|              |       | +17.7 / +7.1    | 6.5  | C 13 H 24 N 9 O 6  |
|              |       | -16.9 / -6.8    | 5.5  | C 16 H 28 N 5 O 7  |
|              |       | +14.4 / +5.8    | 6.0  | C 15 H 26 N 6 O 7  |
|              |       | +11.0 / +4.4    | 5.5  | C 17 H 28 N 3 O 8  |
|              |       | -3.6 / -1.4     | 2.0  | C 9 H 26 N 10 O 8  |
|              |       | +7.7 / +3.1     | 5.0  | C 19 H 30 O 9      |
|              |       | -6.9 / -2.8     | 1.5  | C 11 H 28 N 7 O 9  |
|              |       | -10.2 / -4.1    | 1.0  | C 13 H 30 N 4 O 10 |

[ Theoretical Ion Distribution ]  
 Molecular Formula : C22 H28 N O6  
 (m/z 402.1917, MW 402.4674, U.S. 9.5)  
 Base Peak : 402.1917, Averaged MW : 402.4645(a), 402.4652(w)

| m/z      | INT.     |       |
|----------|----------|-------|
| 402.1917 | 100.0000 | ***** |
| 403.1949 | 25.0650  | ***** |
| 404.1975 | 4.2074   | **    |
| 405.2002 | 0.5302   |       |
| 406.2027 | 0.0545   |       |
| 407.2052 | 0.0048   |       |
| 408.2077 | 0.0004   |       |

Figure S8: HR-FAB-MS spectrum of 2

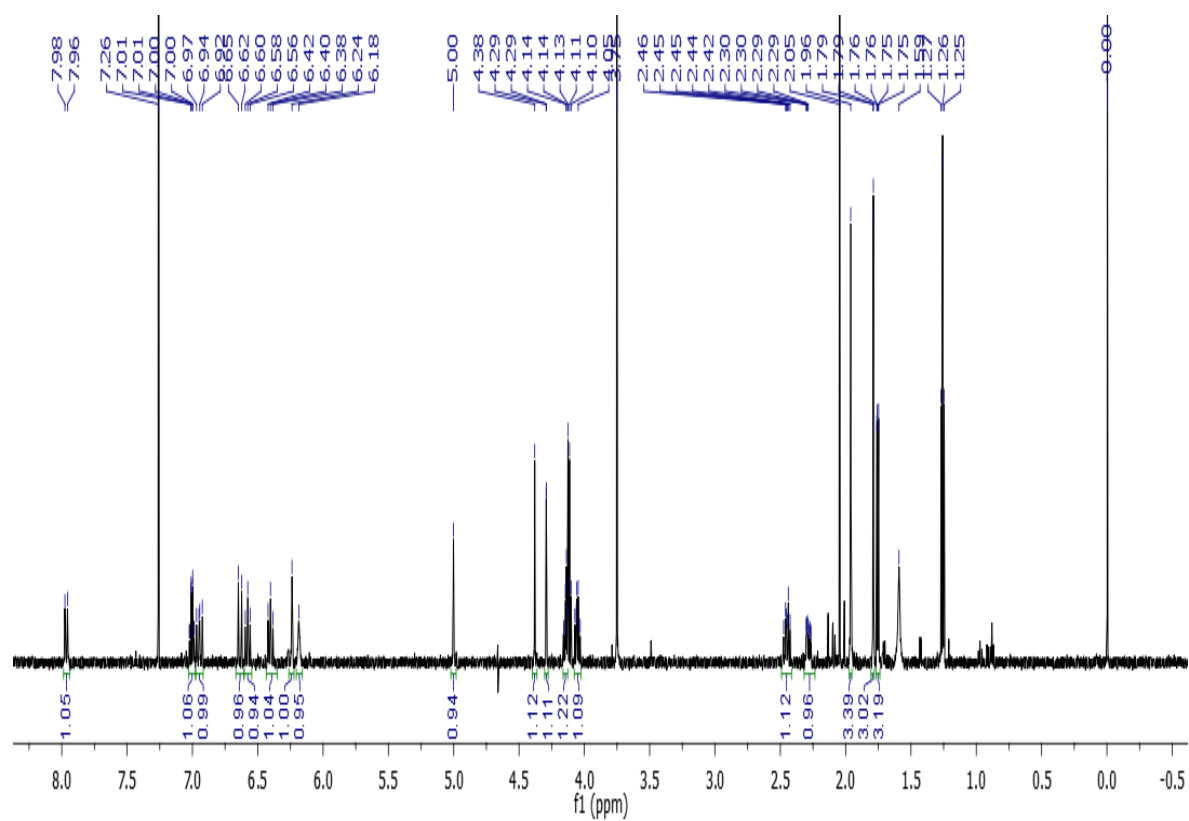

Figure S9: <sup>1</sup>H NMR spectrum of 2 (600 MHz, CDCl<sub>3</sub>)

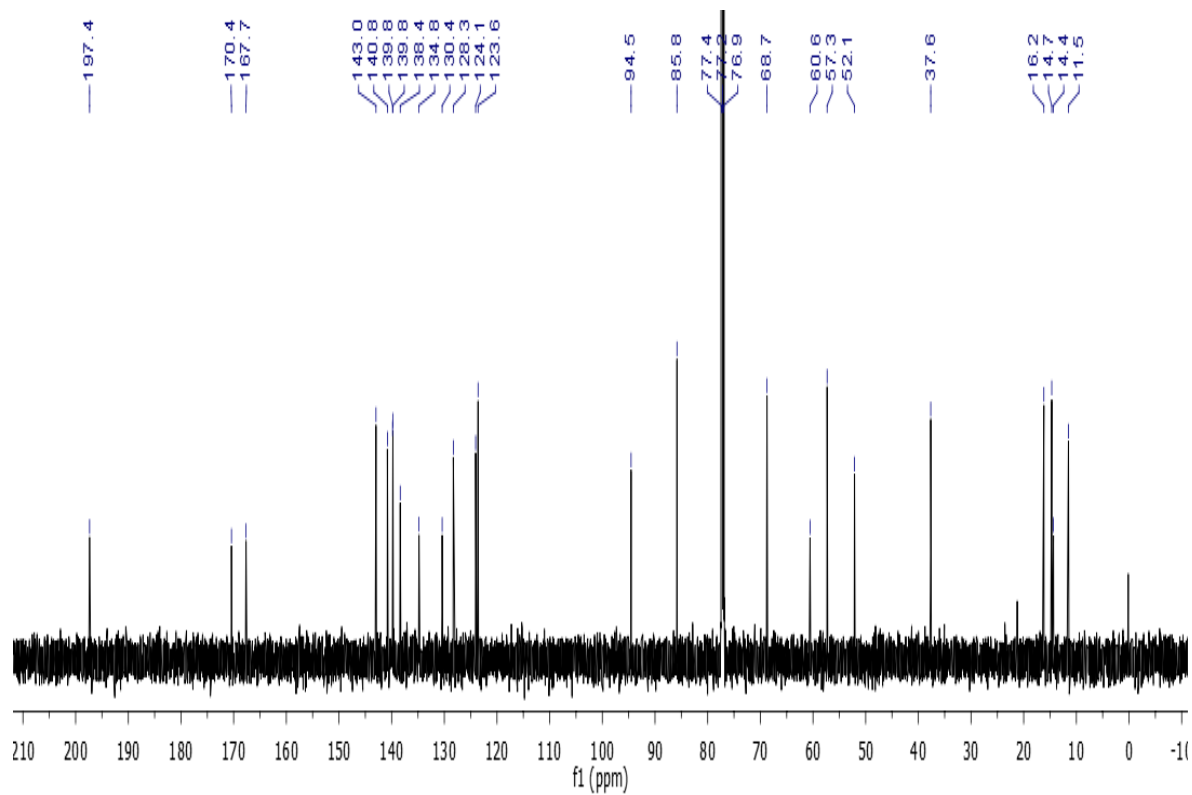

Figure S10: <sup>13</sup>C NMR spectrum of 2 (150 MHz, CDCl<sub>3</sub>)

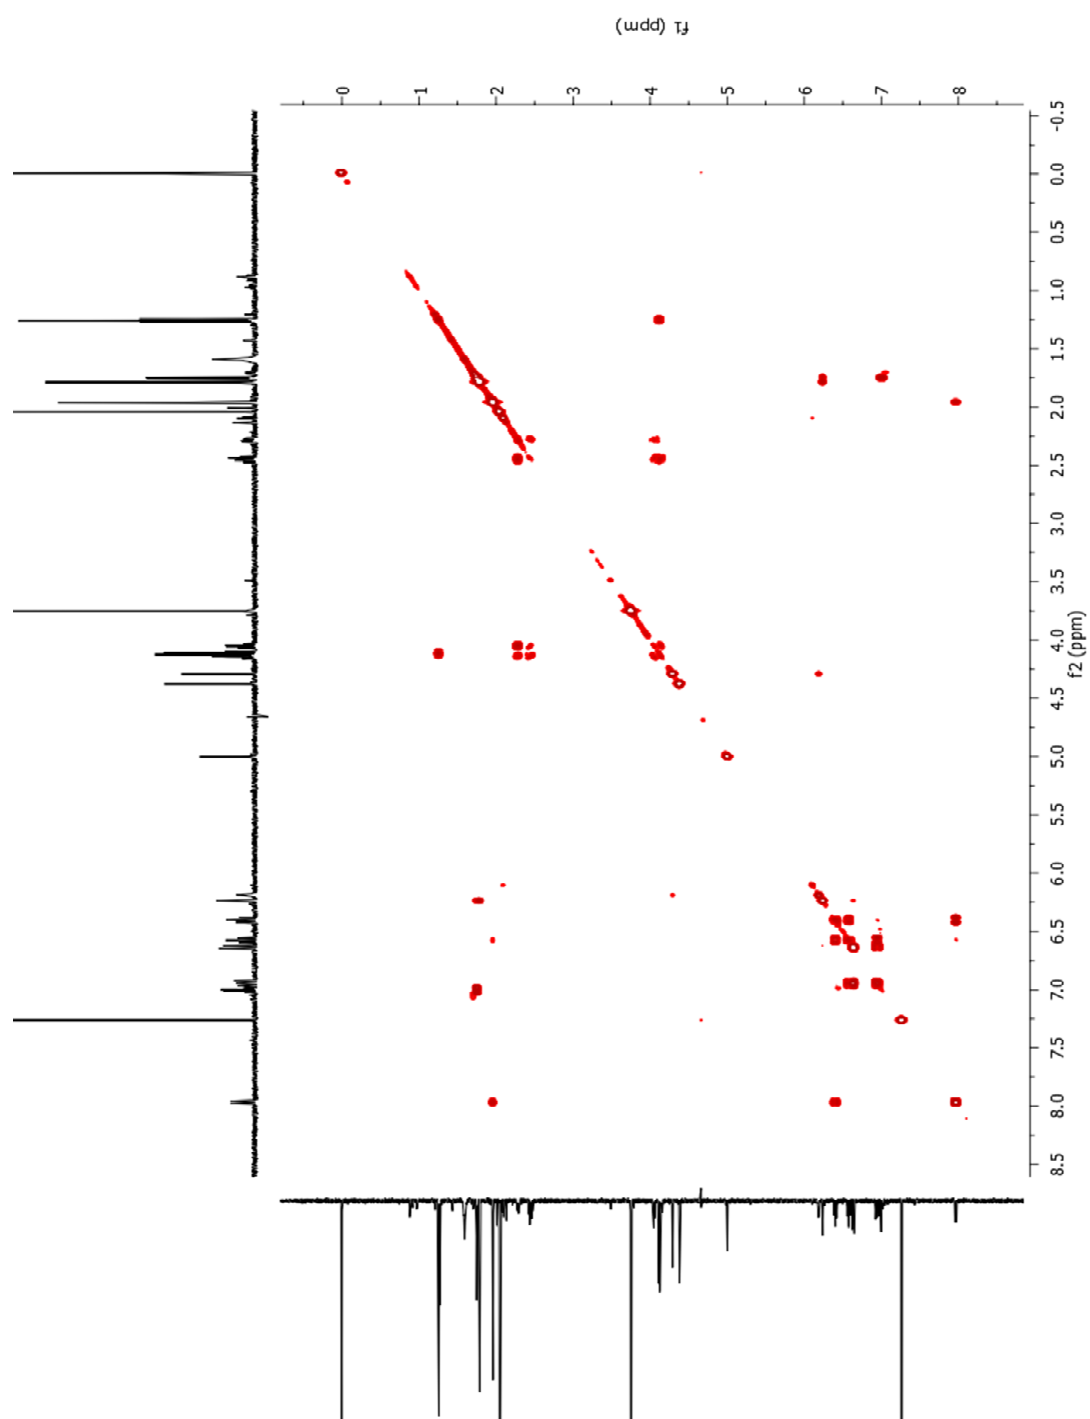

**Figure S11:** COSY Spectra of **2** (600 MHz, CDCl<sub>3</sub>)

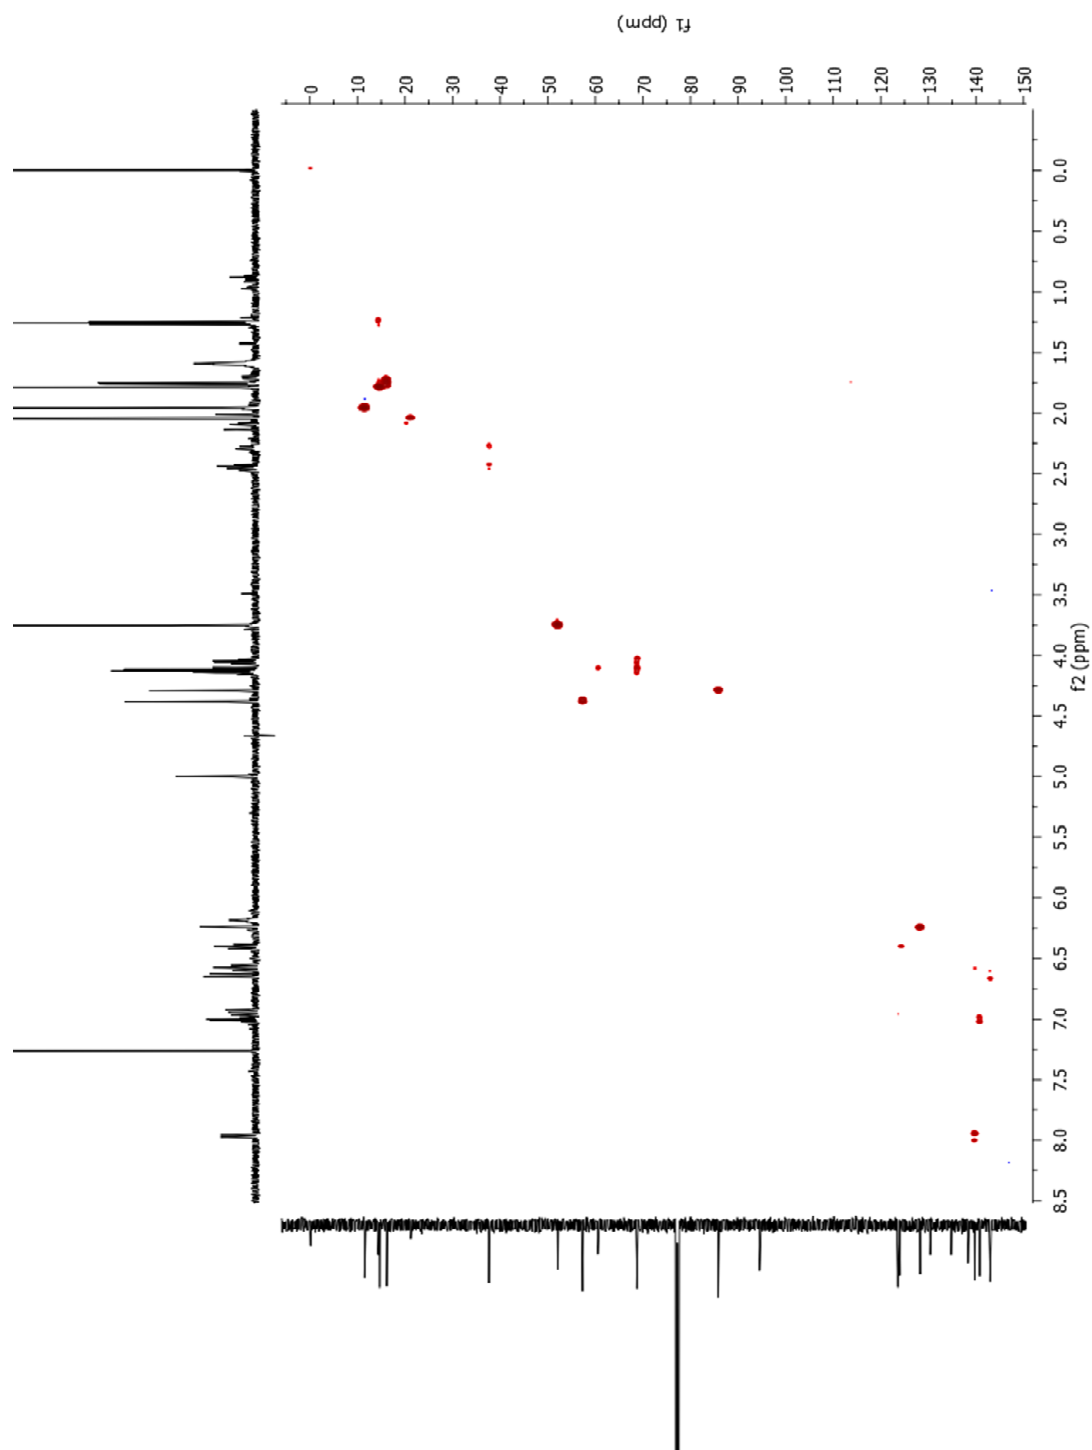

**Figure S12:** HMQC Spectra of **2** (600 MHz, CDCl<sub>3</sub>)

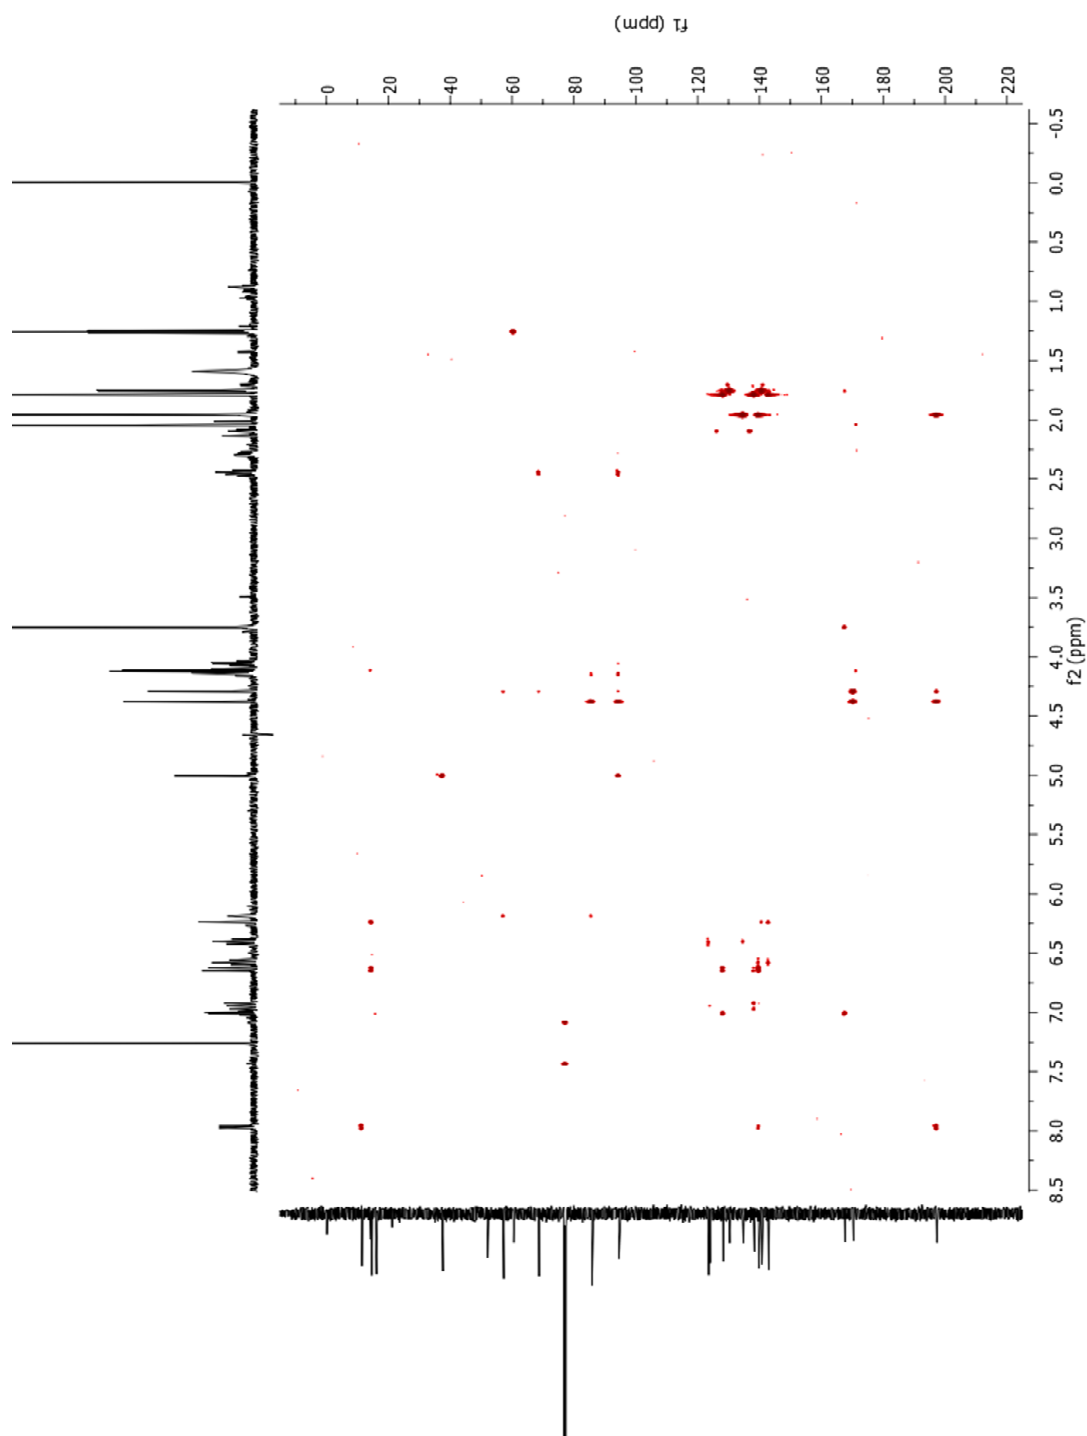

Figure S13: HMBC spectra of **2** (600 MHz, CDCl<sub>3</sub>)



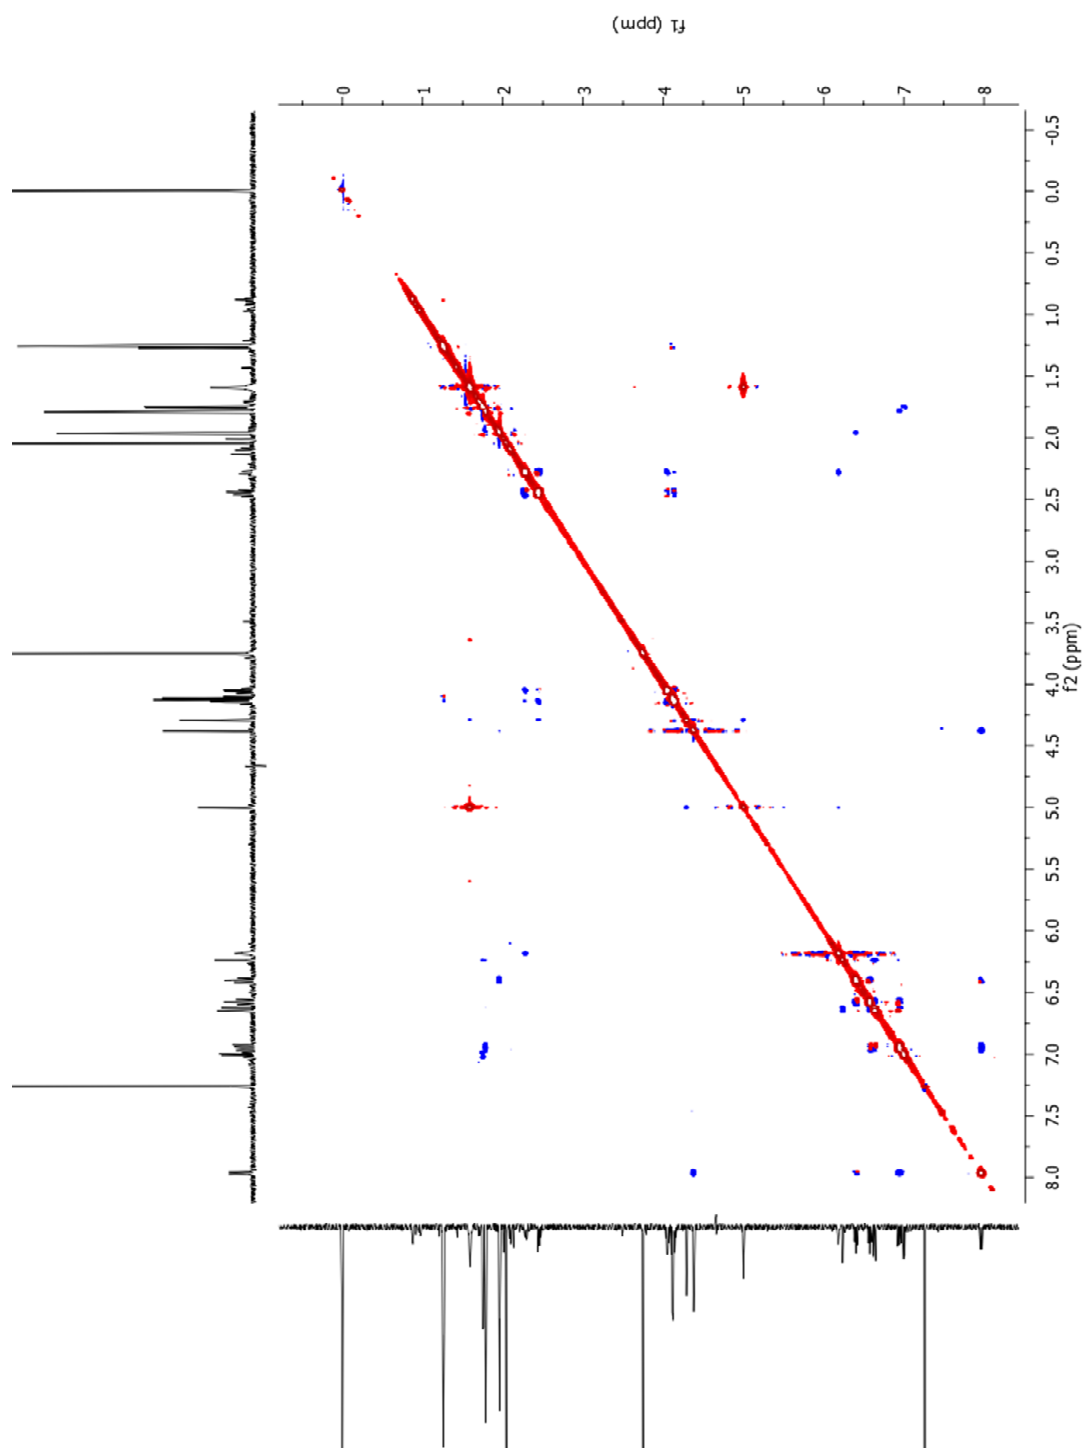

**Figure S14:** NOESY Spectra of **2** (600 MHz, CDCl<sub>3</sub>)

```

[ Elemental Composition ]
Data : FAB-R083                               Date : 18-Jul-2018 17:35
Sample: QFIC(NP)_Pk3
Note : m-NBA
Inlet : Direct                                 Ion Mode : FAB+
RT : 3.80 min                                 Scan#: (172,181)
Elements : C 100/0, H 100/0, N 10/0, O 10/0
Mass Tolerance : 20ppm, 5mmu if m/z < 250, 10mmu if m/z > 500
Unsaturation (U.S.) : -0.5 - 50.0

```

| Observed m/z | Int% | Err [ppm / mmu] | U.S. | Composition        |
|--------------|------|-----------------|------|--------------------|
| 402.1917     | 28.5 | -13.1 / -5.3    | 18.5 | C 28 H 24 N 3      |
|              |      | +18.1 / +7.3    | 19.0 | C 27 H 22 N 4      |
|              |      | -16.5 / -6.6    | 18.0 | C 30 H 26 O        |
|              |      | +14.8 / +6.0    | 18.5 | C 29 H 24 N O      |
|              |      | +0.2 / +0.1     | 15.0 | C 21 H 22 N 8 O    |
|              |      | -3.1 / -1.3     | 14.5 | C 23 H 24 N 5 O 2  |
|              |      | -6.5 / -2.6     | 14.0 | C 25 H 26 N 2 O 3  |
|              |      | +10.2 / +4.1    | 11.0 | C 16 H 22 N 10 O 3 |
|              |      | +6.9 / +2.8     | 10.5 | C 18 H 24 N 7 O 4  |
|              |      | +3.5 / +1.4     | 10.0 | C 20 H 26 N 4 O 5  |
|              |      | +0.2 / +0.1     | 9.5  | C 22 H 28 N O 6    |
|              |      | -14.4 / -5.8    | 6.0  | C 14 H 26 N 8 O 6  |
|              |      | +16.9 / +6.8    | 6.5  | C 13 H 24 N 9 O 6  |
|              |      | -17.7 / -7.1    | 5.5  | C 16 H 28 N 5 O 7  |
|              |      | +13.5 / +5.4    | 6.0  | C 15 H 26 N 6 O 7  |
|              |      | +10.2 / +4.1    | 5.5  | C 17 H 28 N 3 O 8  |
|              |      | -4.4 / -1.8     | 2.0  | C 9 H 26 N 10 O 8  |
|              |      | +6.9 / +2.8     | 5.0  | C 19 H 30 O 9      |
|              |      | -7.7 / -3.1     | 1.5  | C 11 H 28 N 7 O 9  |
|              |      | -11.1 / -4.5    | 1.0  | C 13 H 30 N 4 O 10 |

```

[ Theoretical Ion Distribution ]
Molecular Formula : C22 H28 N O6
(m/z 402.1917, MW 402.4674, U.S. 9.5)
Base Peak : 402.1917, Averaged MW : 402.4645(a), 402.4652(w)

```

| m/z      | INT.     |       |
|----------|----------|-------|
| 402.1917 | 100.0000 | ***** |
| 403.1949 | 25.0650  | ***** |
| 404.1975 | 4.2074   | **    |
| 405.2002 | 0.5302   |       |
| 406.2027 | 0.0545   |       |
| 407.2052 | 0.0048   |       |
| 408.2077 | 0.0004   |       |

**Figure S15:** HR-FAB-MS spectrum of 3

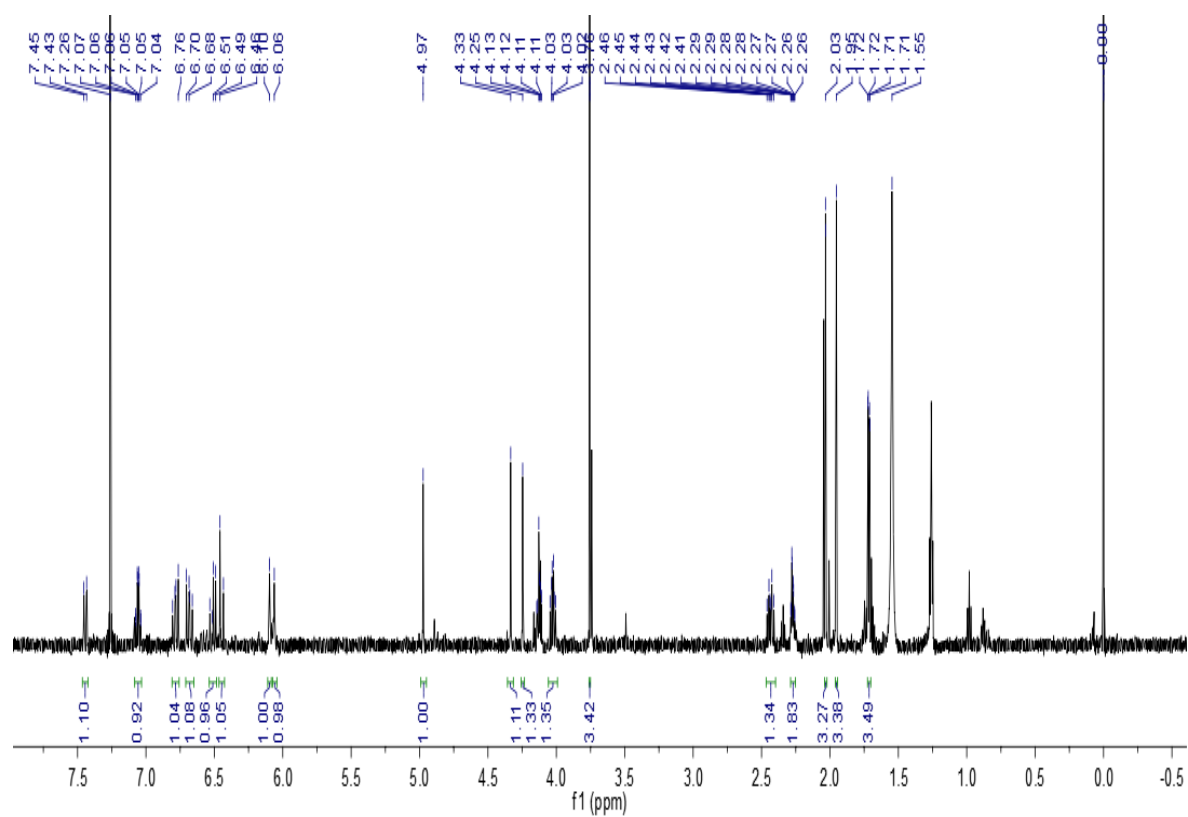

Figure S16: <sup>1</sup>H NMR spectrum of 3 (600 MHz, CDCl<sub>3</sub>)

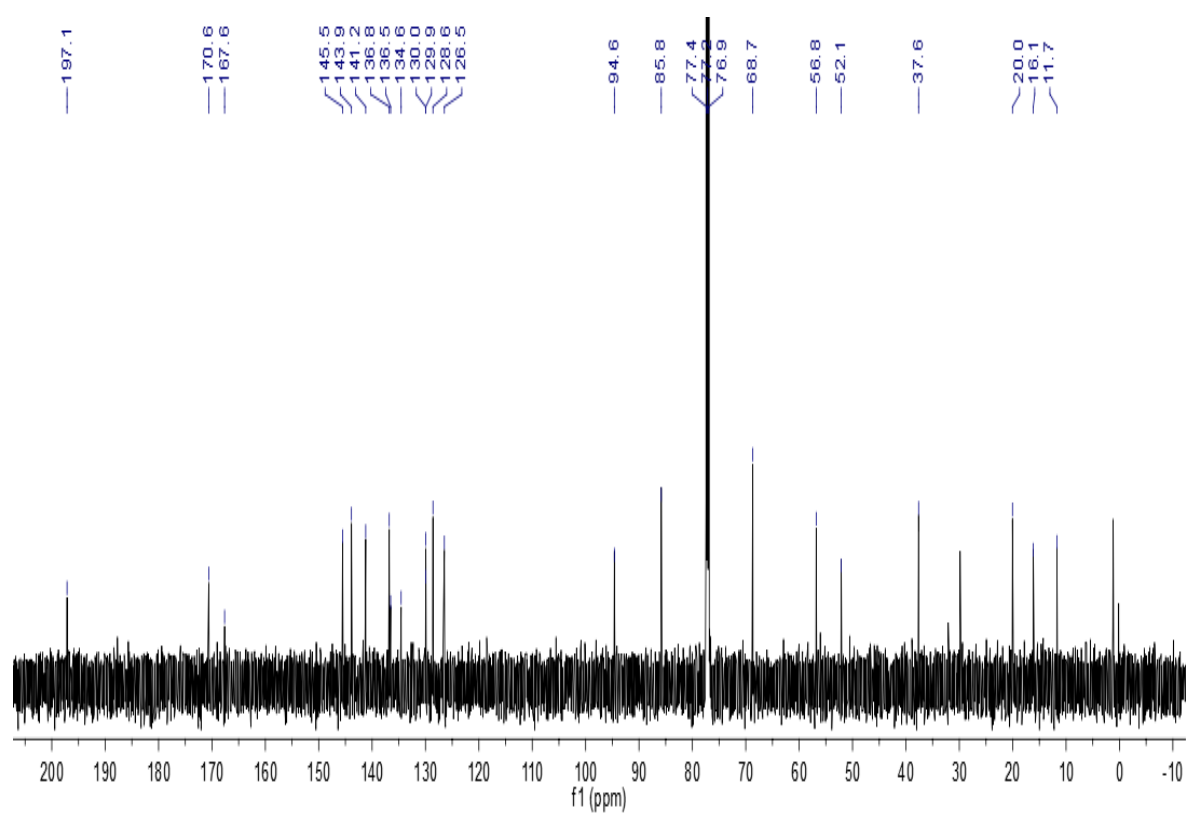

Figure S17: <sup>13</sup>C NMR spectrum of 3 (150 MHz, CDCl<sub>3</sub>)

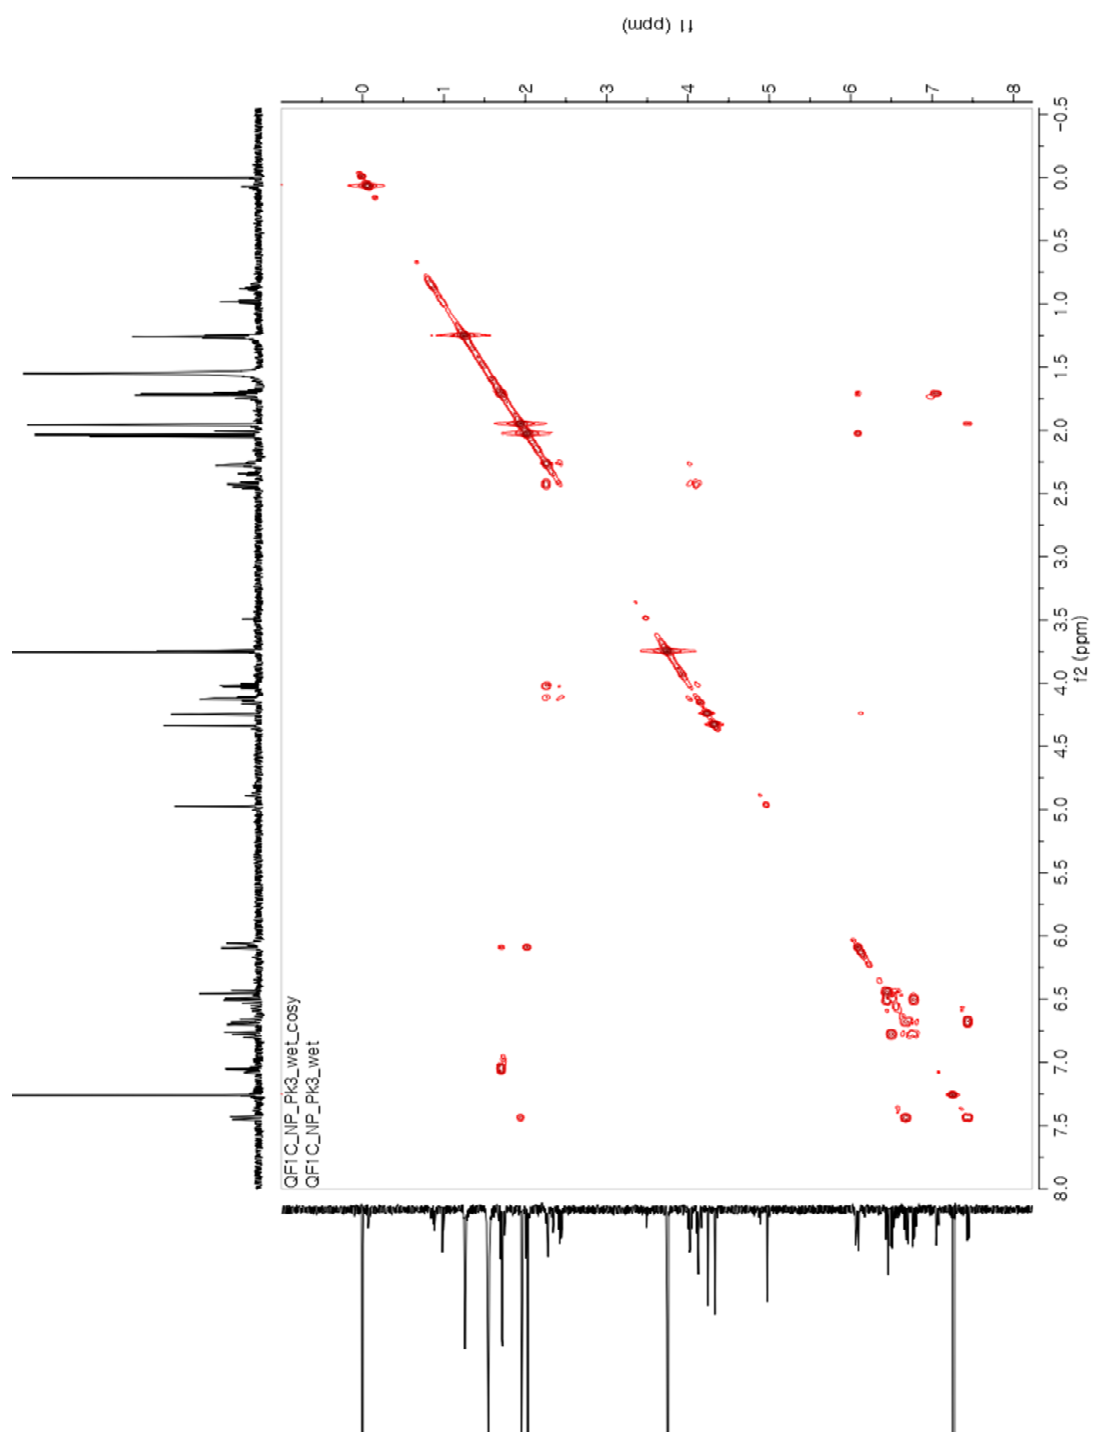

**Figure S18:** COSY Spectra of **3** (600 MHz, CDCl<sub>3</sub>)

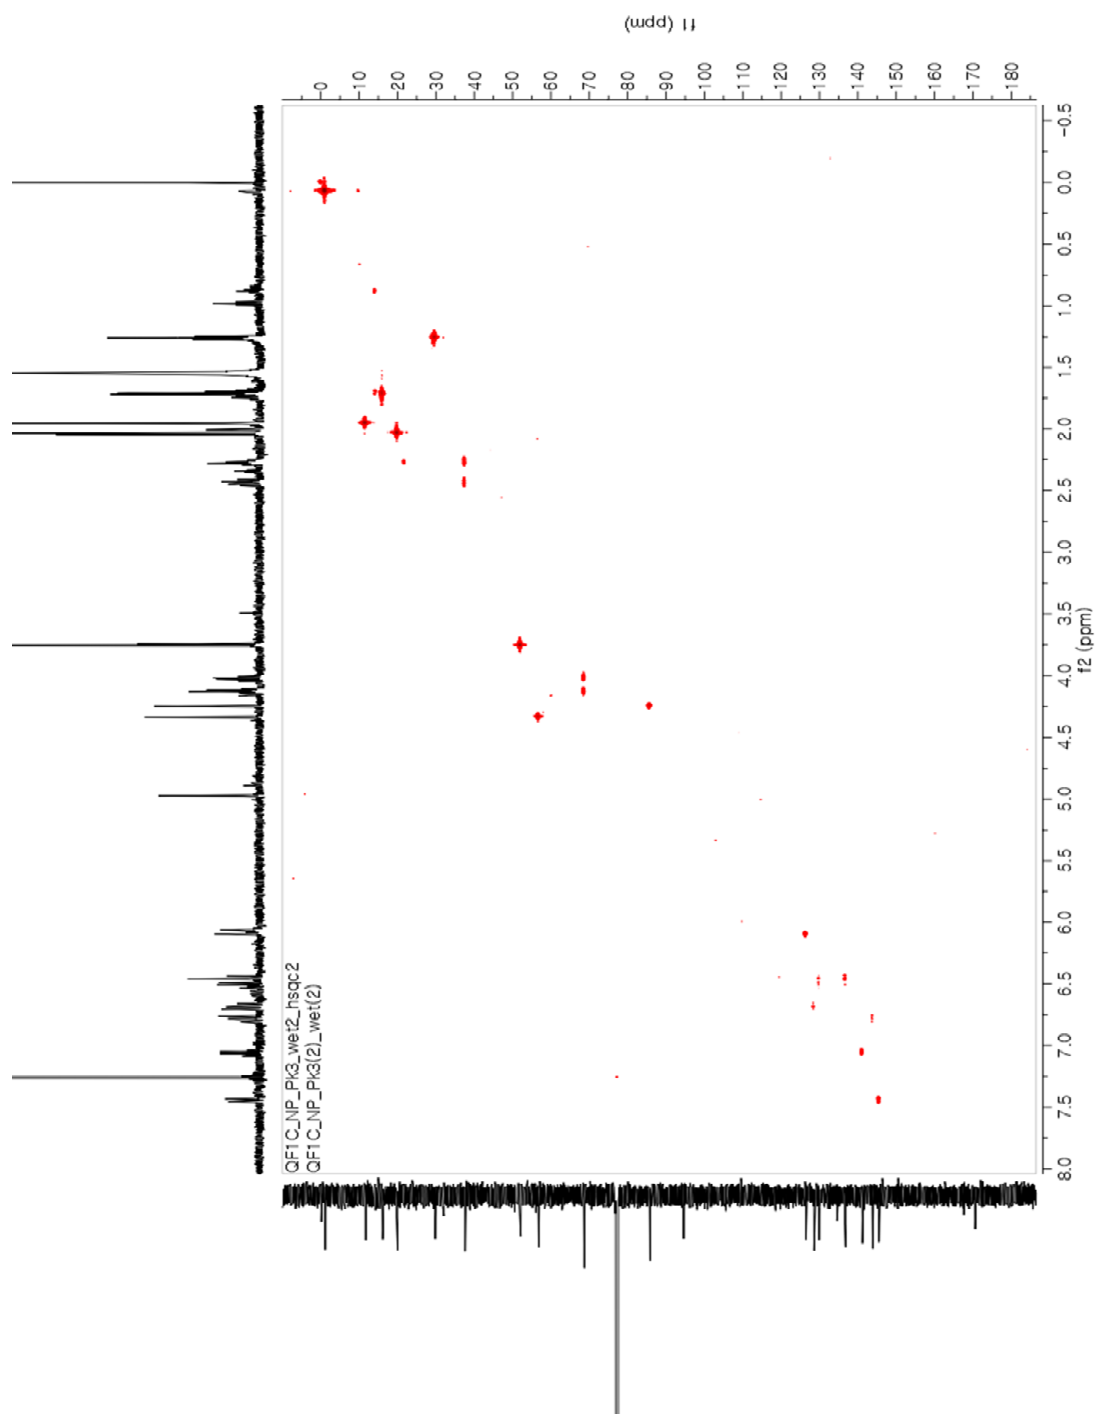

**Figure S19:** HMQC spectra of **3** (600 MHz, CDCl<sub>3</sub>)

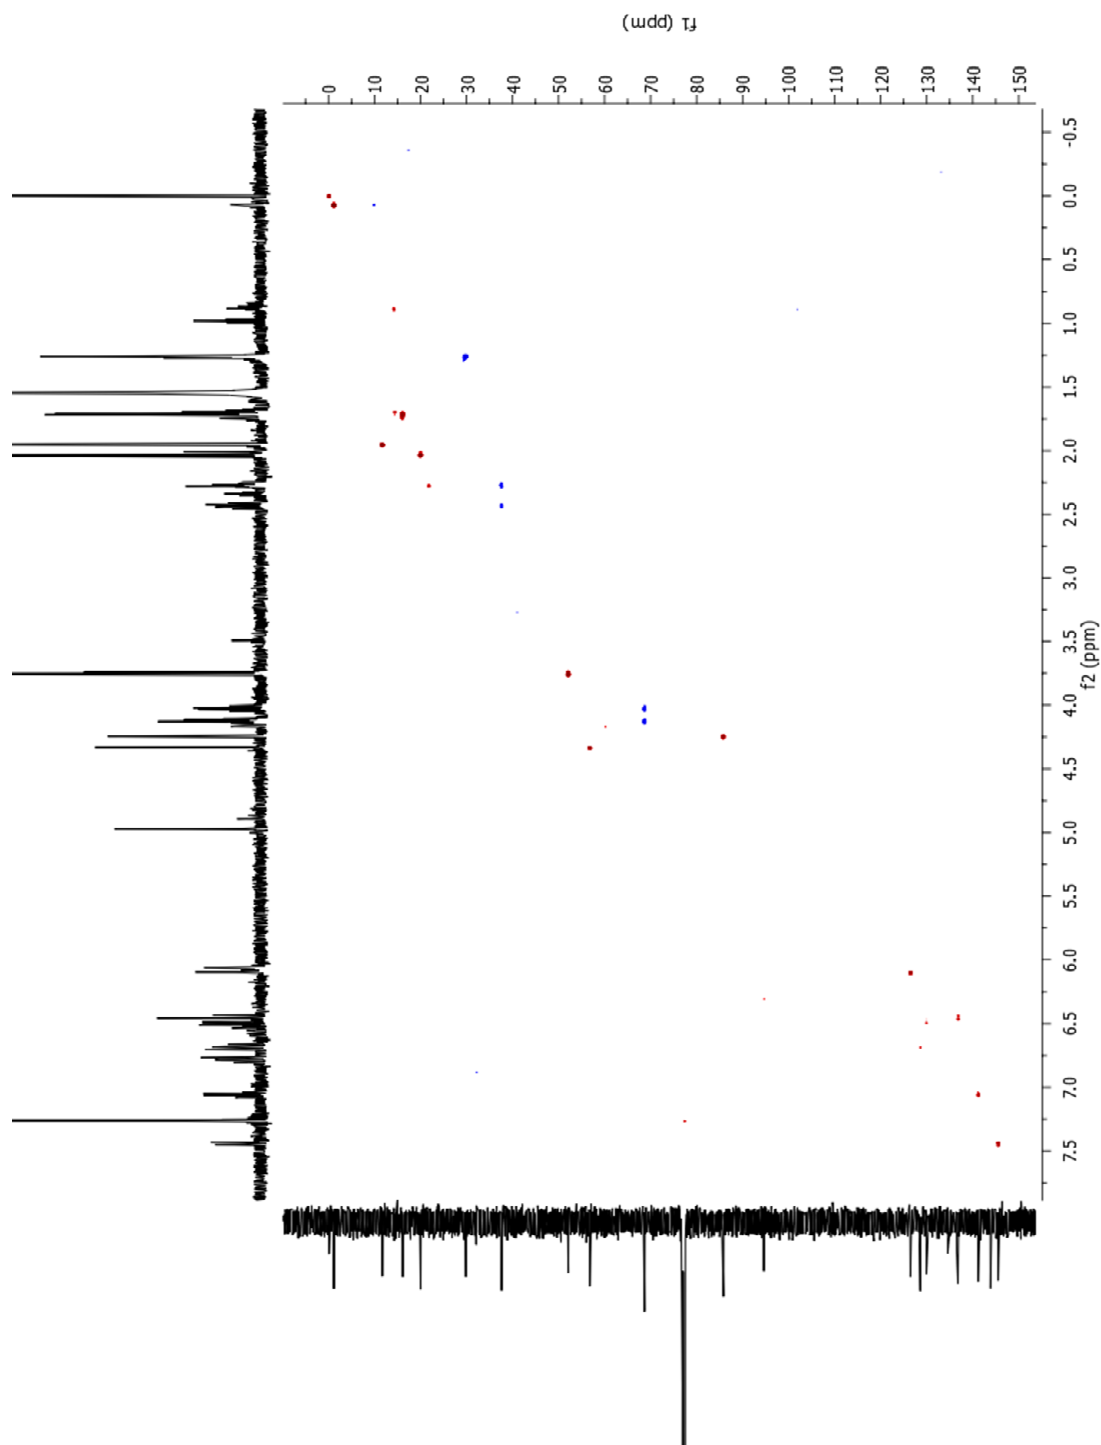

**Figure S20:** HSQC spectra of **3** (600 MHz, CDCl<sub>3</sub>)

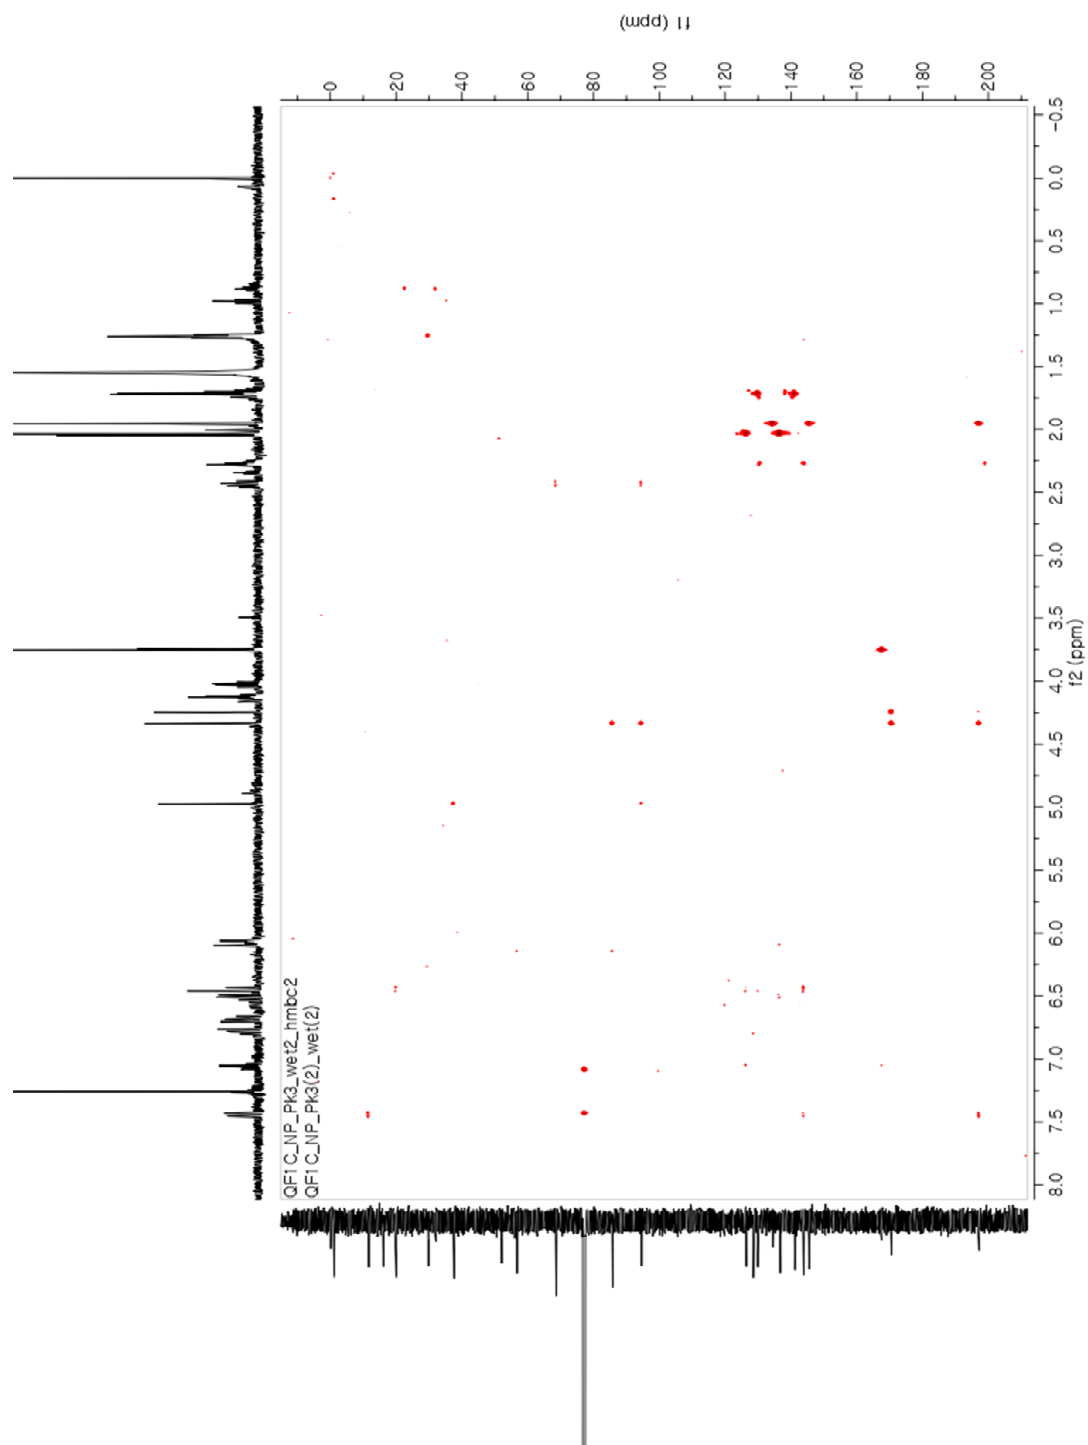

Figure S21: HMBC spectra of **3** (600 MHz, CDCl<sub>3</sub>)

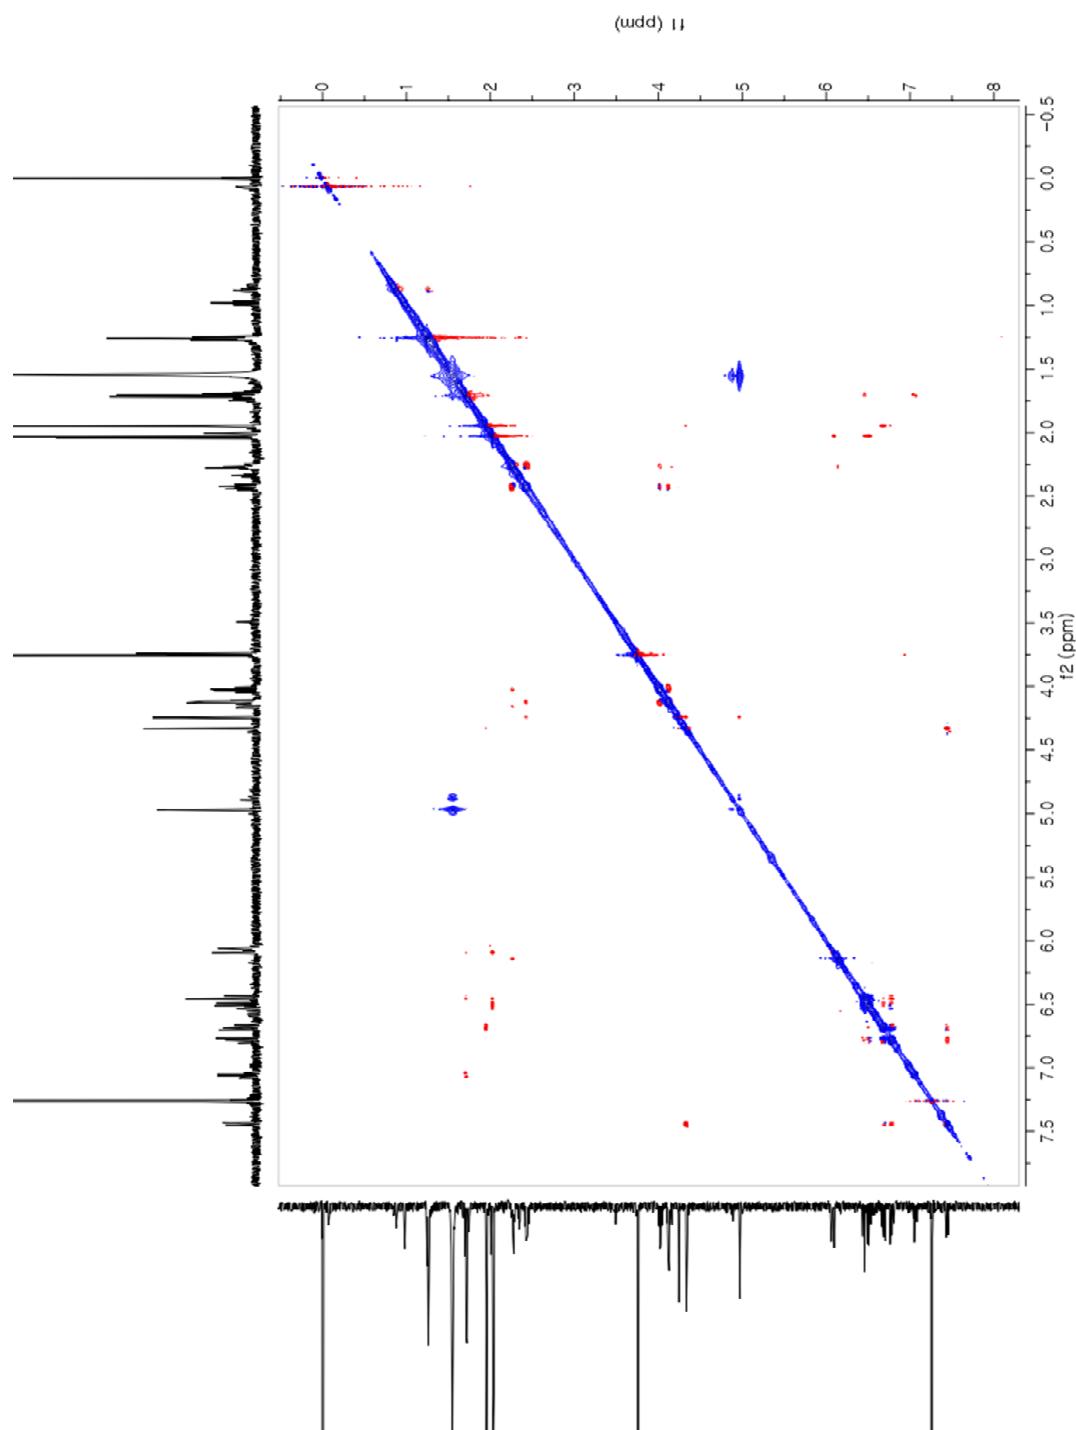

**Figure S22:** NOESY spectra of 3 (600 MHz, CDCl<sub>3</sub>)



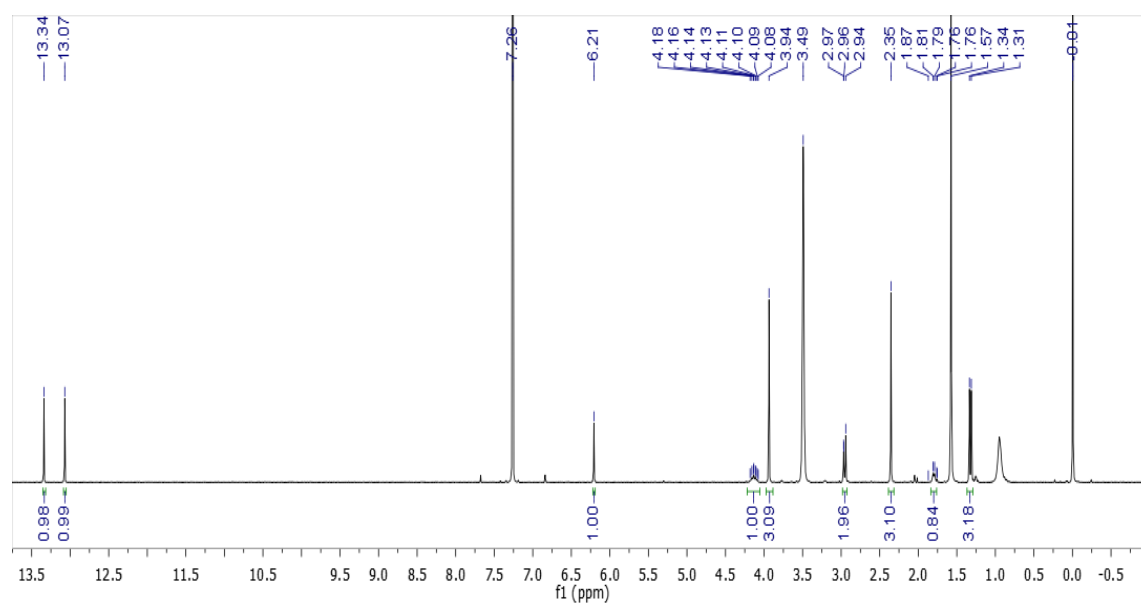

**Figure S23:**  $^1\text{H}$  NMR spectrum of **4** (250 MHz,  $\text{CDCl}_3$ )

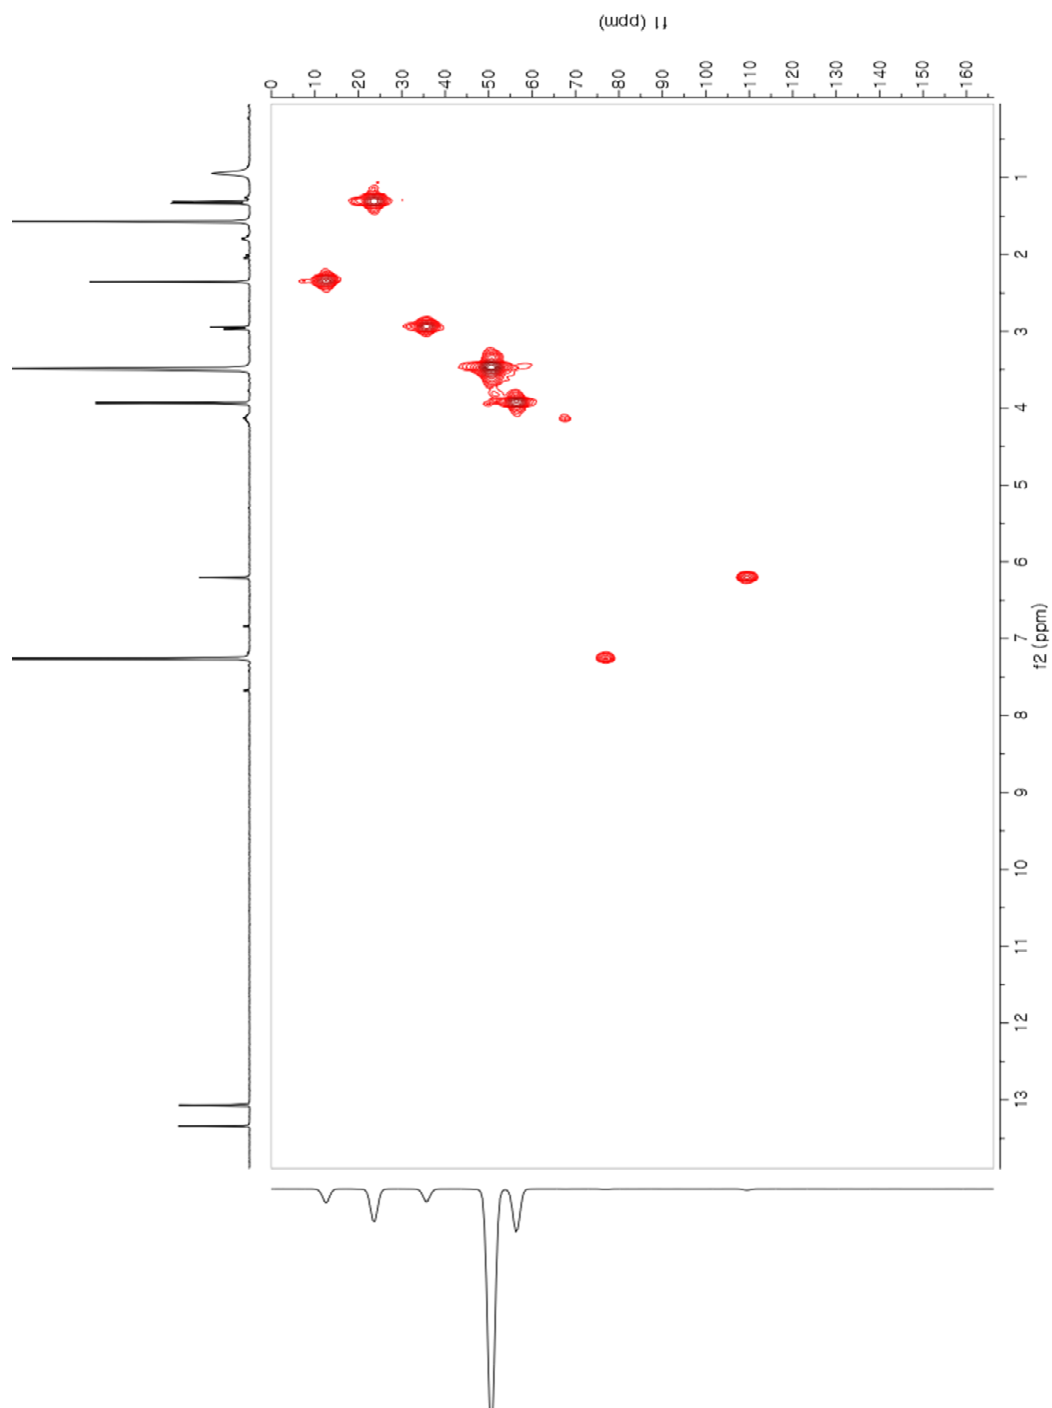

**Figure S24:** HMQC spectra of **4** (250 MHz, CDCl<sub>3</sub>)

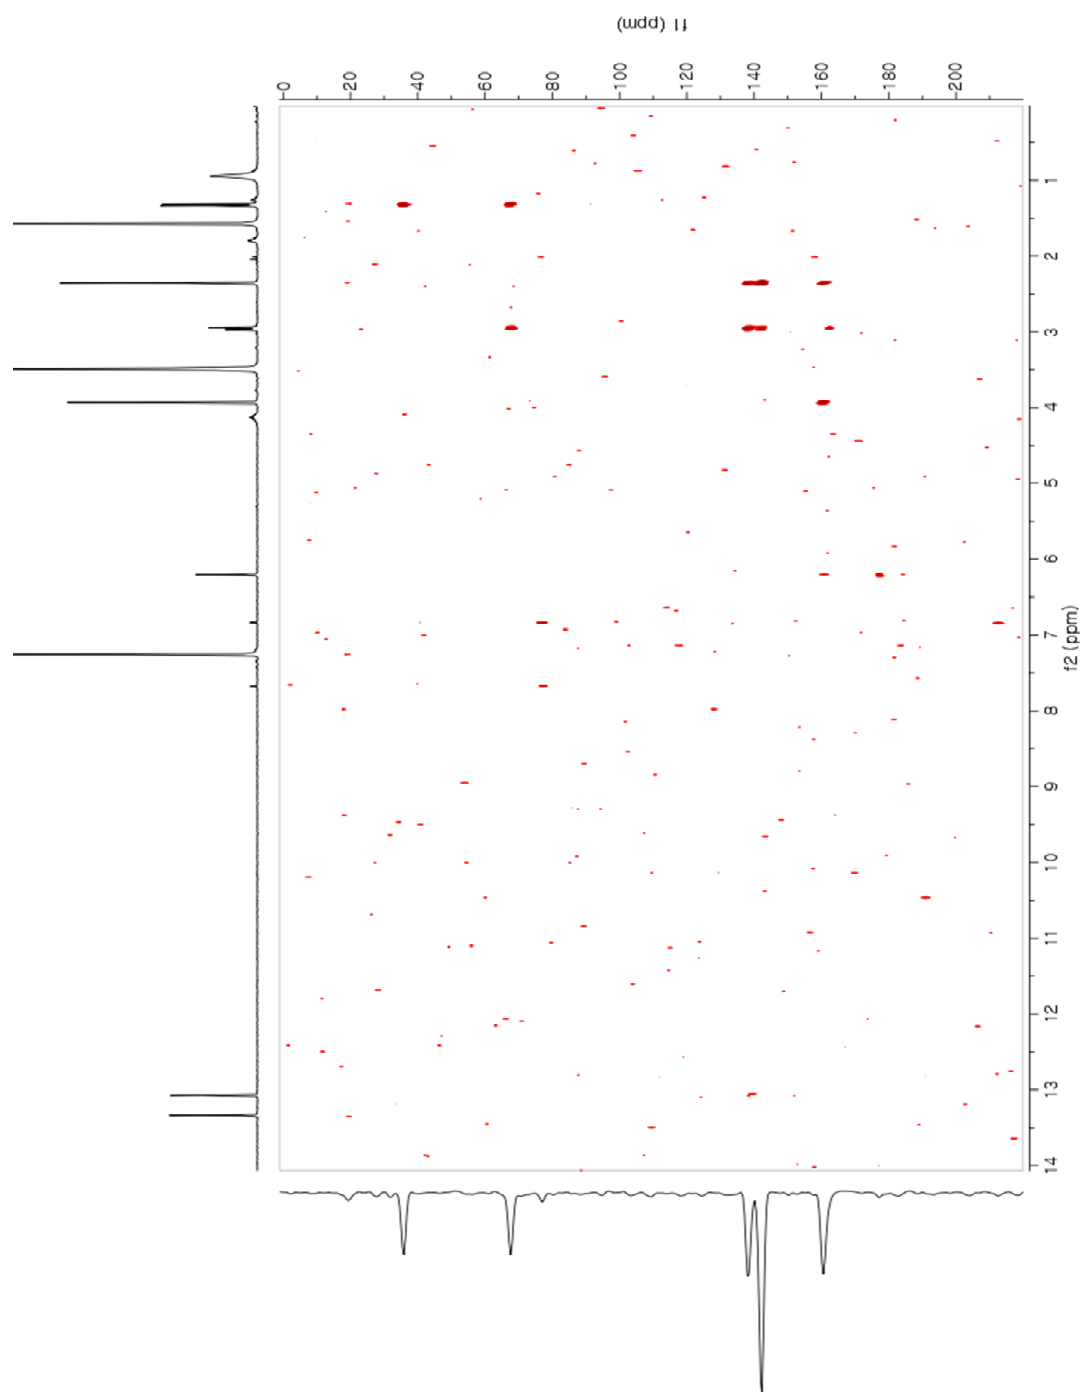

**Figure S25:** HMBC spectra of **4** (250MHz, CDCl<sub>3</sub>)

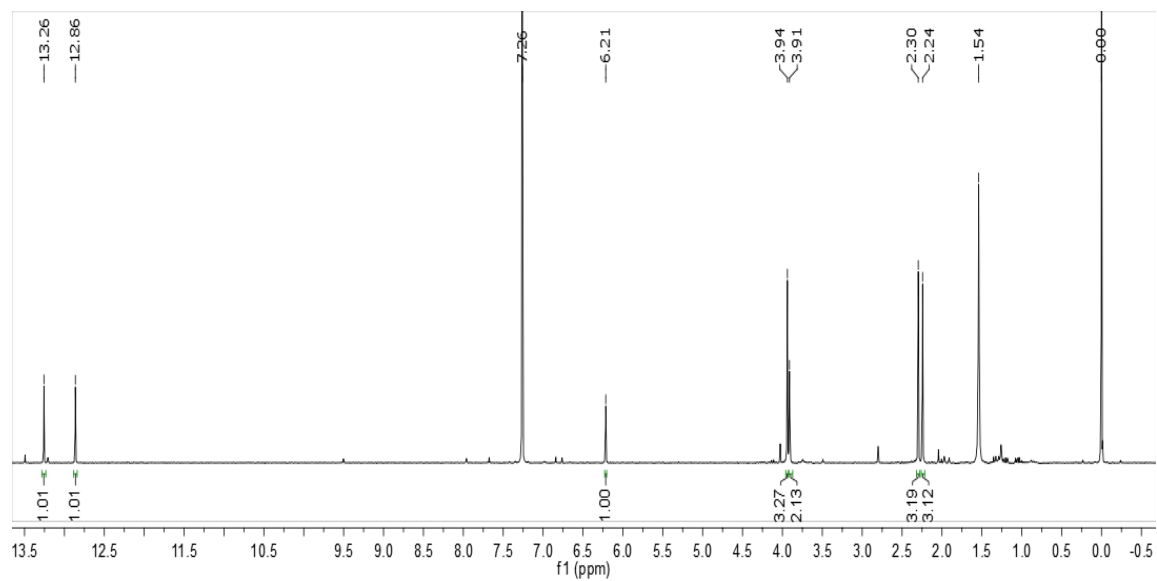

**Figure S26:**  $^1\text{H}$  NMR spectrum of **5** (250 MHz,  $\text{CDCl}_3$ )

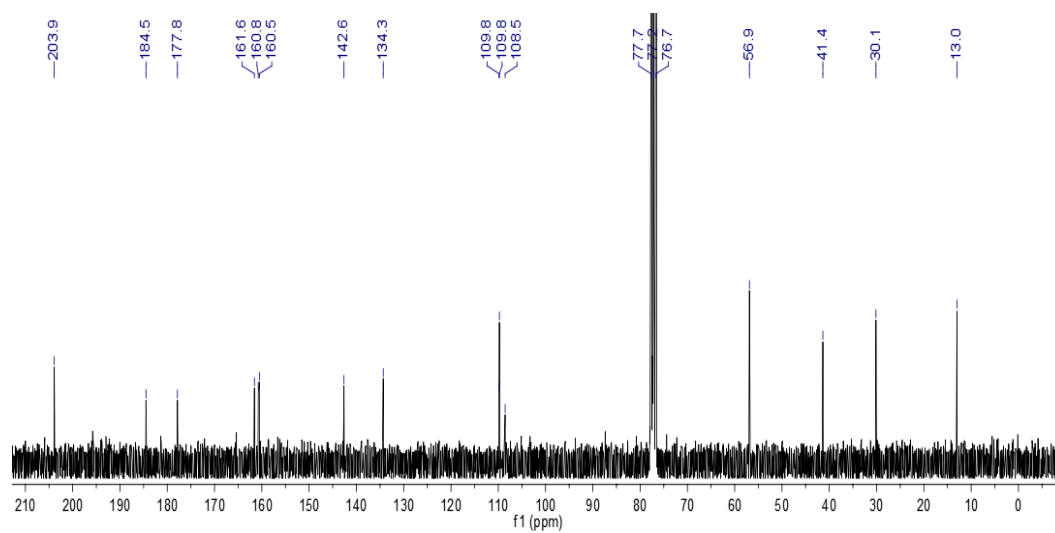

**Figure S27:**  $^{13}\text{C}$  NMR spectrum of **5** (63 MHz,  $\text{CDCl}_3$ )

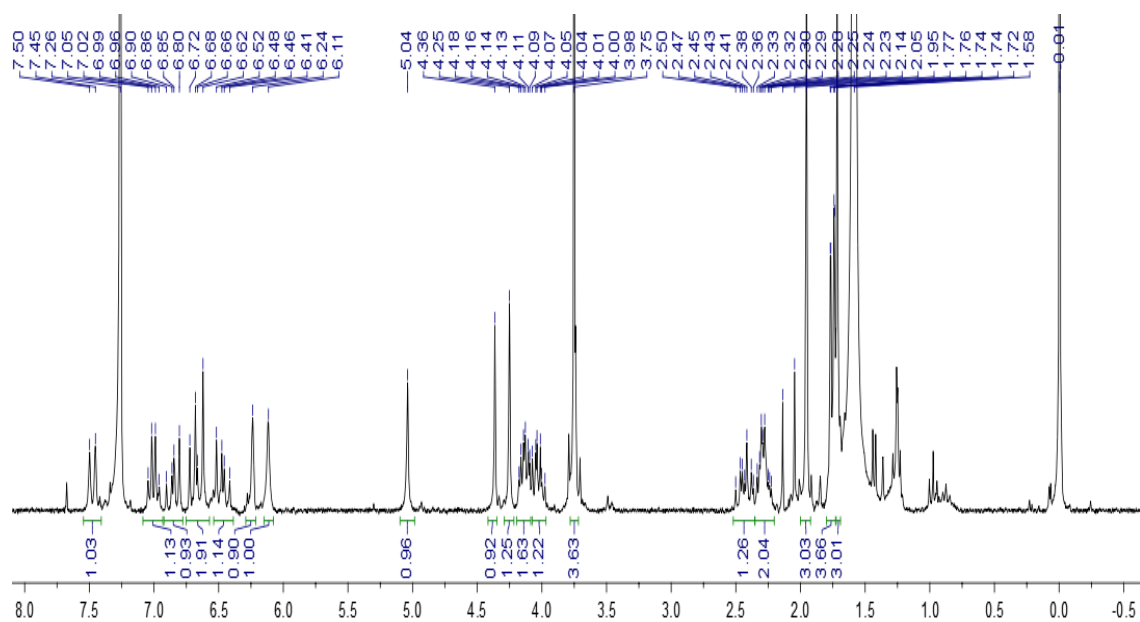

Figure S28:  $^1\text{H}$  NMR spectrum of **6** (600 MHz,  $\text{CDCl}_3$ )

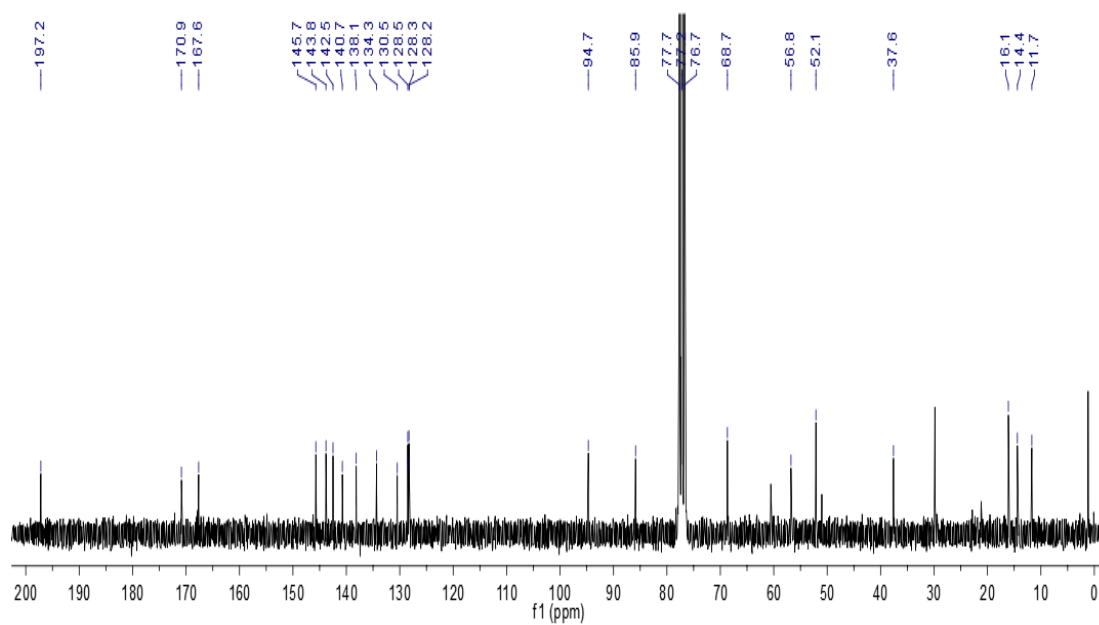

Figure S1:  $^{13}\text{C}$  NMR spectrum of **6** (150 MHz,  $\text{CDCl}_3$ )

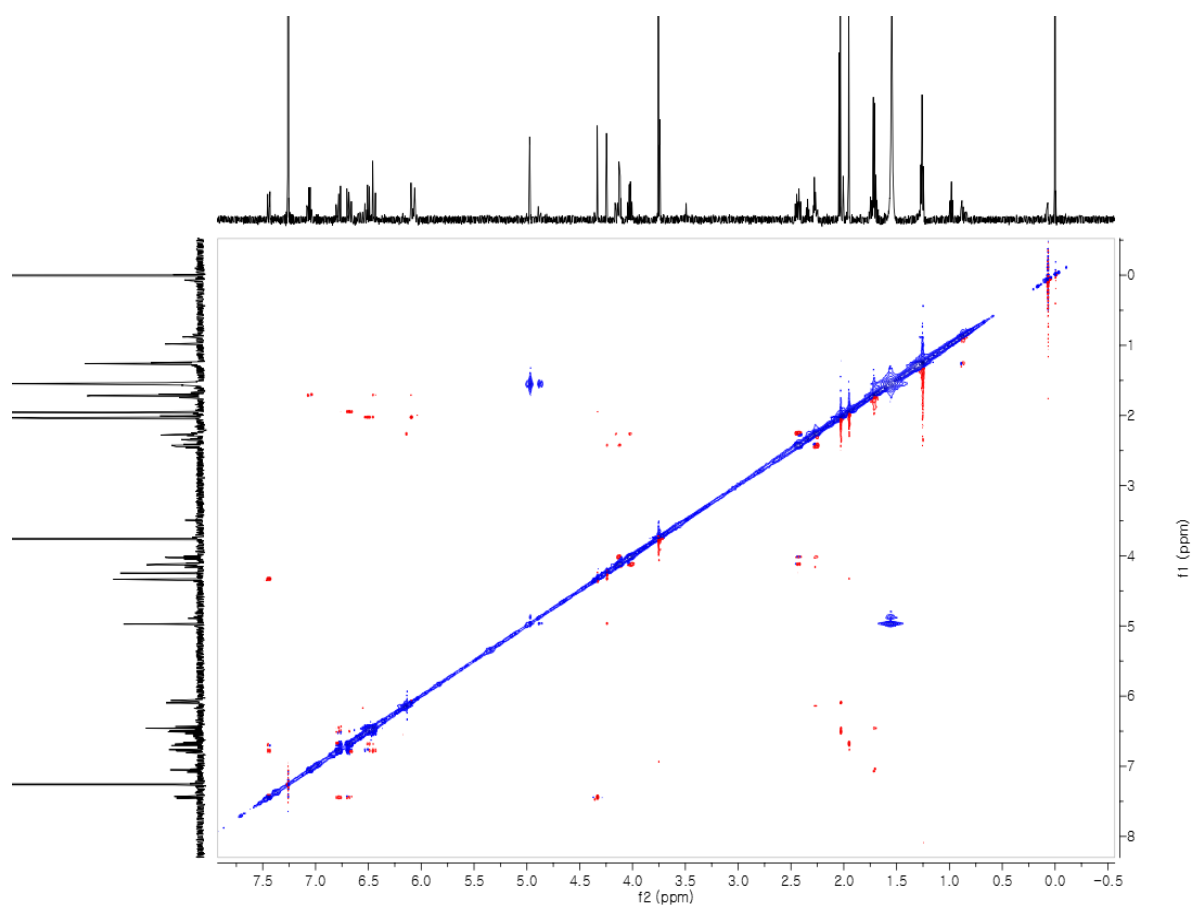

Figure S30: NOESY spectra of 6 (250 MHz, CDCl<sub>3</sub>)

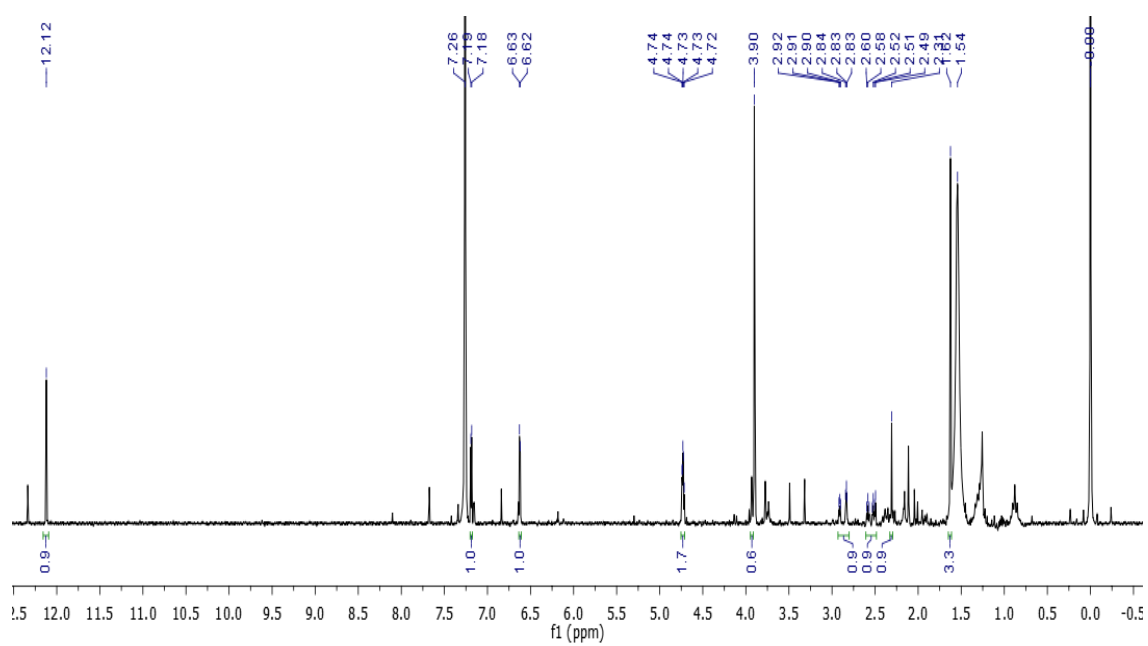

Figure S31: <sup>1</sup>H NMR spectrum of 7 (250 MHz, CDCl<sub>3</sub>)

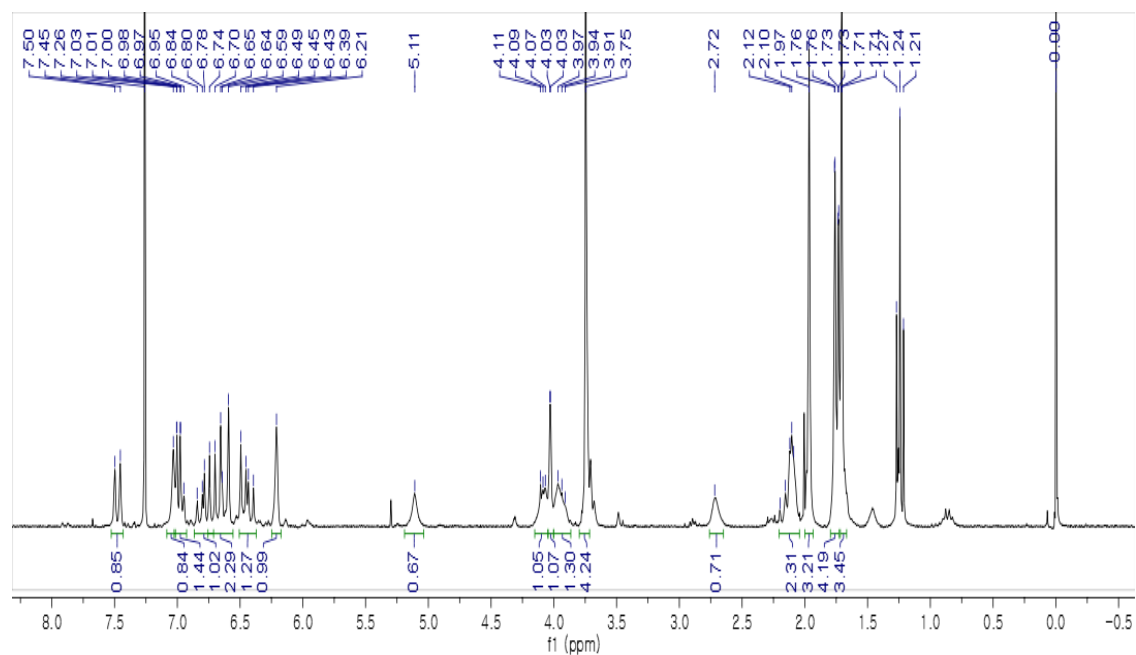

Figure S32: <sup>1</sup>H NMR spectrum of 8 (250 MHz, CDCl<sub>3</sub>)

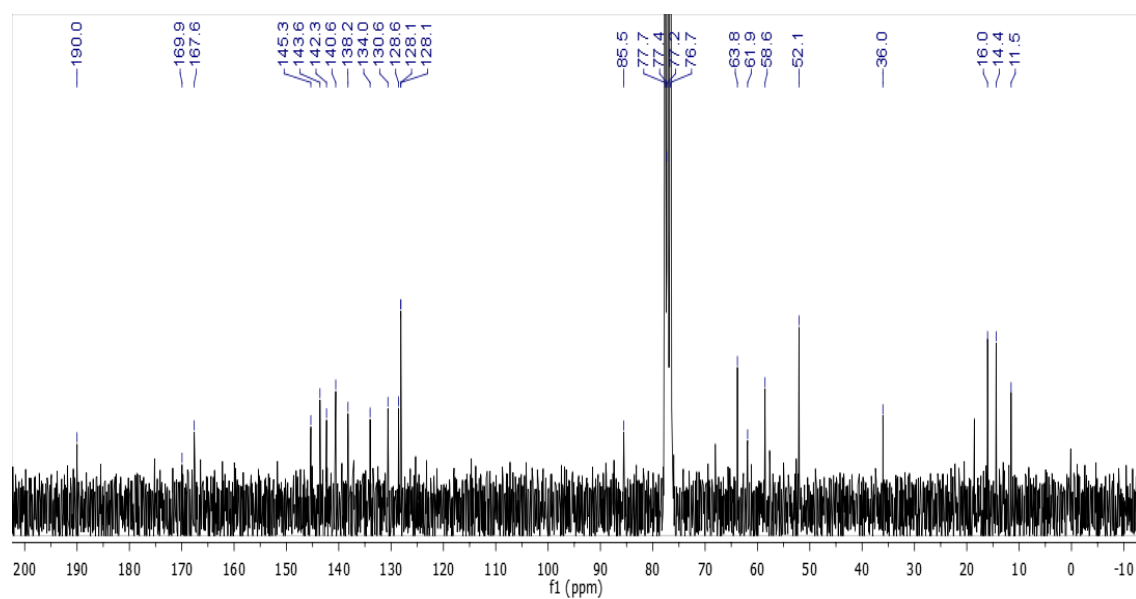

Figure S33: <sup>13</sup>C NMR spectrum of 8 (63 MHz, CDCl<sub>3</sub>)

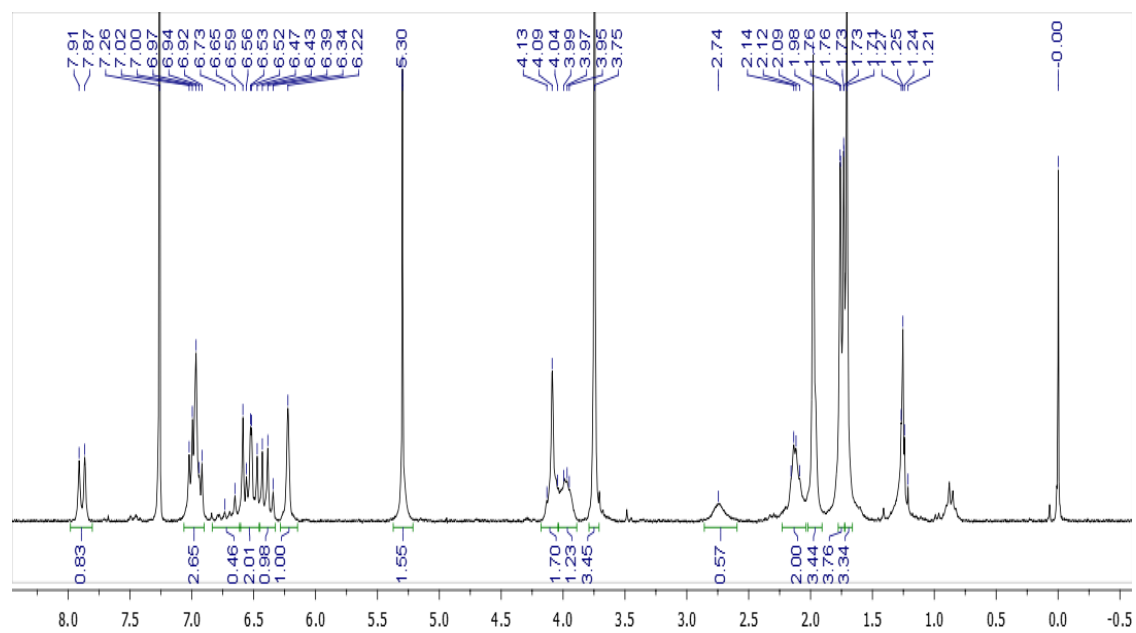

Figure S34:  $^1\text{H}$  NMR spectrum of **9** (250 MHz,  $\text{CDCl}_3$ )

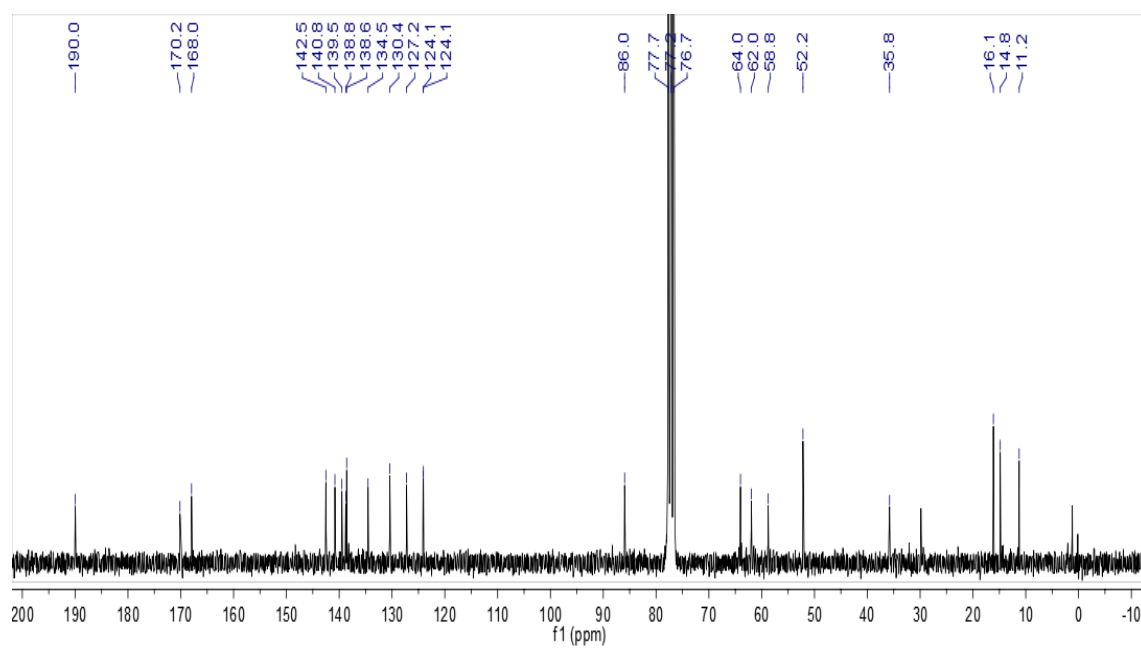

Figure S352:  $^{13}\text{C}$  NMR spectrum of **9** (63 MHz,  $\text{CDCl}_3$ )



**Macrophage cell line (Raw264.7)**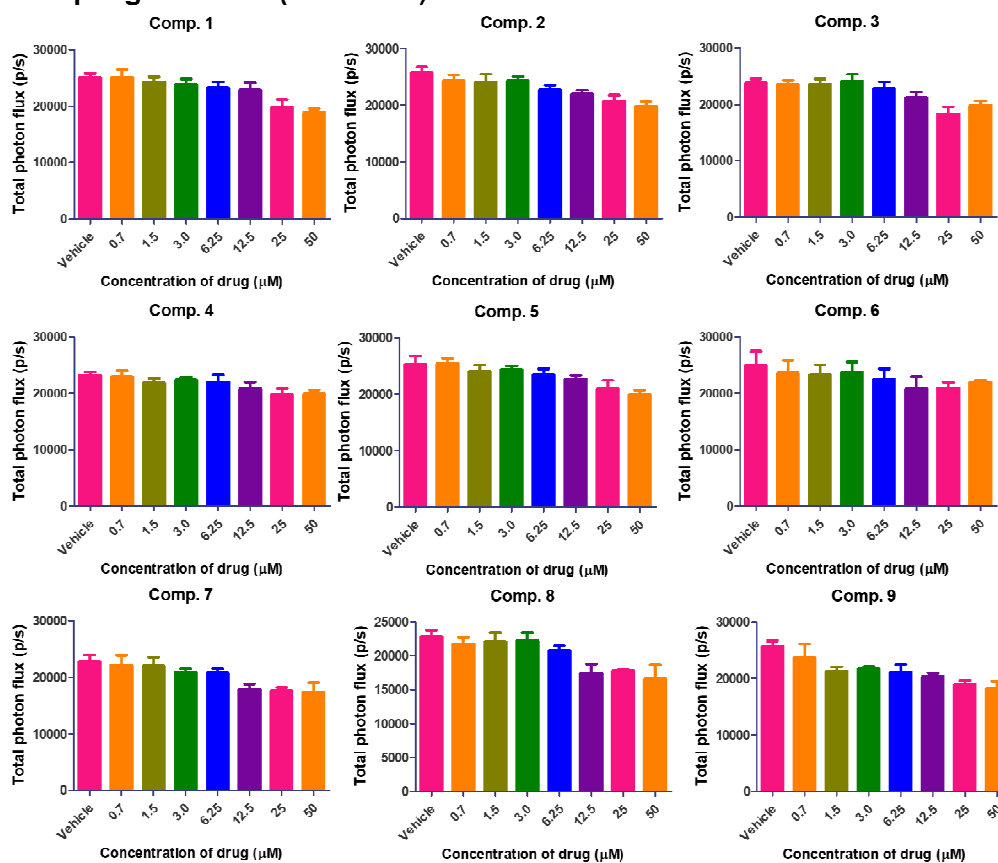

**Figure S36:** Effect on cell viability of compounds 1-9. Cell proliferation in macrophage cell line (RAW264.7) with or without compounds 1-9

**Table S1:** NMR spectroscopic data (600/ 150 MHz, CDCl<sub>3</sub>) for **2** ( $\delta$  in ppm)

| Position | $\delta_{\text{H}}$ (multiplicity, $J$ in Hz) | $\delta_{\text{C}}$ type | $^1\text{H}$ - $^1\text{H}$ COSY | HMBC           | NOESY      |
|----------|-----------------------------------------------|--------------------------|----------------------------------|----------------|------------|
| 1        | 1.75 (dd, 7.2, 1.3)                           | 16.2                     | 2                                | 2, 3           | 2          |
| 2        | 7.00 (qd, 7.2, 0.6)                           | 140.8                    |                                  | 1, 4, 20,      | 1          |
| 3        |                                               | 130.4                    |                                  |                |            |
| 4        | 6.24 (br s)                                   | 128.3                    |                                  | 2, 6, 22       | 6          |
| 5        |                                               | 138.4                    |                                  |                | 4, 7       |
| 6        | 6.64 (d, 15.1)                                | 143.0                    | 7                                | 4, 5, 8, 22    |            |
| 7        | 6.95 (dd, 15.1, 11.7)                         | 123.6                    | 6, 8                             | 5, 8           | 6, 10, 22  |
| 8        | 6.58 (dd, 11.7, 11.1)                         | 139.8                    | 7, 9                             | 6              | 9          |
| 9        | 6.40 (dd, 11.6, 11.1)                         | 124.1                    | 8, 10                            | 8, 10, 11      | 8, 23      |
| 10       | 7.97 (d, 11.6)                                | 139.8                    |                                  | 8, 12, 23      | 7, 13      |
| 11       |                                               | 134.8                    |                                  |                |            |
| 12       |                                               | 197.4                    |                                  |                |            |
| 13       | 4.38 (br s)                                   | 57.3                     |                                  | 12, 14, 15, 17 | 10         |
| 14       | 4.29 (d, 0.6)                                 | 85.8                     |                                  | 12, 13, 17, 19 | 15, 18, 19 |
| 15       |                                               | 94.5                     |                                  |                |            |
| 15-OH    | 5.00 (s)                                      |                          |                                  | 15, 18         | 14         |
| 16-NH    | 6.18 (br s)                                   |                          |                                  | 13, 14         | 18         |
| 17       |                                               | 170.4                    |                                  |                |            |
| 18a      | 2.28 (ddd, 12.7, 6.5, 3.6)                    | 37.6                     | 19                               | 15, 19         | 19a, 19b   |
| 18b      | 2.45 (dt, 12.7, 8.8)                          |                          |                                  |                | 19a, 20b   |
| 19a      | 4.05 (td, 8.8, 6.5)                           | 68.7                     | 18                               |                | 18a, 18b   |
| 19b      | 4.14 (td, 8.8, 3.6)                           |                          |                                  |                | 18a, 18b   |
| 20       |                                               | 167.7                    |                                  |                |            |
| 21       | 3.75 (s)                                      | 52.1                     |                                  | 20             |            |
| 22       | 1.79 (d, 1.0)                                 | 14.7                     |                                  | 4, 5, 6        | 7          |
| 23       | 1.96 (d, 0.5)                                 | 11.5                     |                                  | 10, 11, 12     | 9          |

**Table S2:** NMR spectroscopic data (600/ 150 MHz, CDCl<sub>3</sub>) for **3** ( $\delta$  in ppm)

| Position | $\delta_{\text{H}}$ (multiplicity, $J$ in Hz) | $\delta_{\text{C}}$ type | $^1\text{H}$ - $^1\text{H}$ COSY | HMBC           | NOESY |
|----------|-----------------------------------------------|--------------------------|----------------------------------|----------------|-------|
| 1        | 1.72 (dd, 7.2, 1.4)                           | 16.1                     | 2                                | 2, 3           |       |
| 2        | 7.06 (qd, 7.2, 1.0)                           | 141.2                    | 1                                | 1, 20          |       |
| 3        |                                               | 130.0                    |                                  |                |       |
| 4        | 6.10 (br s)                                   | 126.5                    |                                  | 5, 6           | 22    |
| 5        |                                               | 136.5                    |                                  |                | 7     |
| 6        | 6.45 (d, 15.3)                                | 136.8                    | 7                                | 4, 7, 8        | 8, 22 |
| 7        | 6.51 (dd, 15.3, 10.4)                         | 129.9                    | 8                                | 6, 7, 9        | 5, 9  |
| 8        | 6.78 (dd, 14.6, 10.4)                         | 143.9                    | 7                                | 6, 9           | 6, 10 |
| 9        | 6.68 (dd, 14.6, 11.5)                         | 128.6                    | 10                               | 7, 8           | 7, 23 |
| 10       | 7.44 (d, 11.5)                                | 145.5                    | 9                                | 8, 12, 23      | 8, 13 |
| 11       |                                               | 134.6                    |                                  |                |       |
| 12       |                                               | 197.1                    |                                  |                |       |
| 13       | 4.33 (br s)                                   | 56.8                     |                                  | 12, 14, 15, 17 | 10    |
| 14       | 4.25 (d, 0.7)                                 | 85.8                     |                                  | 12, 17         |       |
| 15       |                                               | 94.6                     |                                  |                |       |
| 15-OH    | 4.97 (s)                                      |                          |                                  | 18             |       |
| 16-NH    | 6.06 (br s)                                   |                          |                                  | 13, 14         |       |
| 17       |                                               | 170.6                    |                                  |                |       |
| 18a      | 2.27 (m)                                      | 37.6                     |                                  |                |       |
| 18b      | 2.43 (dt, 12.7, 8.8)                          |                          | 15, 19                           |                |       |
| 19a      | 4.03 (td, 8.8, 6.4)                           | 68.7                     | 18                               |                |       |
| 19b      | 4.13 (td, 8.8, 3.8)                           |                          |                                  |                |       |
| 20       |                                               | 167.6                    |                                  |                |       |
| 21       | 3.76 (s)                                      | 52.1                     | 20                               | 20             |       |
| 22       | 2.03 (d, 1.3)                                 | 20.0                     | 4, 6                             | 4, 5, 6        | 4, 6  |
| 23       | 1.95 (d, 0.8)                                 | 11.7                     | 10, 11, 12                       | 10, 11, 12     |       |

**Table S33:** Energy minimization of 13S\*, 14S\*, 15S\* furanopyrrolidone (Case I)

Boltzmann distribution of energy minimized conformer

| Conformer | Calculated Energy (G)<br>(atomic units) | Relative<br>Energy<br>(kcal/mol) | Boltzmann<br>Weights (%) |
|-----------|-----------------------------------------|----------------------------------|--------------------------|
| 1         | -667.003592                             | 0.000000                         | 100.000000               |

Optimized Z-Matrixes of major conformer in the chloroform (Å)

| Atom | X        | Y        | Z        |
|------|----------|----------|----------|
| C    | 0.575535 | -0.27888 | -0.81329 |
| C    | 1.187996 | 0.581904 | 0.303179 |
| C    | 2.658926 | 0.378873 | -0.04979 |
| C    | 2.622235 | -1.14676 | -0.42724 |
| O    | 1.219585 | -1.52219 | -0.67733 |
| N    | 0.404355 | 1.790049 | 0.107233 |
| C    | -0.87279 | 1.498722 | -0.31686 |
| C    | -0.93418 | -0.01566 | -0.7487  |
| O    | -1.81002 | 2.27877  | -0.37972 |
| C    | -1.77924 | -0.83803 | 0.230537 |
| O    | -1.43985 | -0.99298 | 1.398942 |
| C    | -3.04988 | -1.42713 | -0.31006 |
| H    | -1.39949 | -0.05824 | -1.73506 |
| H    | 0.883657 | 0.180559 | -1.76543 |
| O    | 1.047982 | 0.076322 | 1.613862 |
| H    | 3.324256 | 0.570891 | 0.793426 |
| H    | 2.95968  | 0.994863 | -0.90046 |
| H    | 2.976344 | -1.78101 | 0.38632  |
| H    | 3.200926 | -1.35103 | -1.33319 |
| H    | 0.57318  | 2.655287 | 0.608035 |
| H    | -3.57905 | -1.97704 | 0.468577 |
| H    | -2.8194  | -2.09128 | -1.15164 |
| H    | -3.68544 | -0.62535 | -0.70523 |
| H    | 0.141537 | -0.28571 | 1.731312 |

**Table S44:** Energy minimization of three conformers of 13S\*, 14S\*, 15R\* furanopyrrolidone (Case II)

Boltzmann distribution of energy minimized conformers

| Conformer | Calculated Energy (G)<br>(atomic units) | Relative Energy<br>(kcal/mol) | Boltzmann Weights (%) |
|-----------|-----------------------------------------|-------------------------------|-----------------------|
| 1         | -667.003592                             | 0.000000                      | 99.192498858          |
| 2         | -667.179546                             | 0.831450                      | 0.262591423           |
| 3         | -667.179709                             | 0.729166                      | 0.544909718           |

Optimized Z-Matrixes of major conformer in the chloroform (Å)

| Atom | X        | Y        | Z        |
|------|----------|----------|----------|
| C    | 0.821479 | 0.41333  | 0.661622 |
| C    | 0.352946 | 1.43944  | -0.37649 |
| C    | -0.99732 | 1.289777 | -0.51756 |
| C    | -1.62012 | 0.24795  | 0.28116  |
| O    | -0.38174 | -0.55029 | 0.805513 |
| N    | -0.27072 | -1.70384 | -0.03182 |
| C    | -1.2717  | -1.67858 | -1.0766  |
| C    | -2.38771 | -0.78473 | -0.54617 |
| O    | 2.156194 | -0.30078 | 0.404171 |
| C    | 2.813925 | -0.66861 | 1.36594  |
| O    | 2.597701 | -0.53965 | -1.0141  |
| C    | 0.952435 | 0.954375 | 1.606446 |
| H    | 1.042716 | 2.275028 | -0.95023 |
| H    | -2.47618 | 0.776687 | 1.274291 |
| O    | -0.52239 | -0.87777 | 1.838373 |
| H    | -1.53389 | 1.914234 | -1.10825 |
| H    | -0.83201 | -1.27625 | -1.99853 |
| H    | -1.58499 | -2.70884 | -1.25706 |
| H    | -2.98839 | -0.32397 | -1.33457 |
| H    | -3.05037 | -1.33745 | 0.125481 |
| H    | 1.816033 | -1.08292 | -1.55551 |
| H    | 3.526121 | -1.11225 | -1.02281 |
| H    | 2.740525 | 0.420408 | -1.52126 |
| H    | -2.02199 | 1.487703 | 1.750454 |

**Table S55:** Energy minimization of 13S\*, 14R\*, 15R\* furanopyrrolidone (Case III)

Boltzmann distribution of energy minimized conformer

| Conformer | Calculated Energy (G)<br>(atomic units) | Relative<br>Energy<br>(kcal/mol) | Boltzmann<br>Weights (%) |
|-----------|-----------------------------------------|----------------------------------|--------------------------|
| 1         | -667.004109                             | 0.000000                         | 100.000000               |

Optimized Z-Matrixes of major conformer in the chloroform (Å)

| Atom | X        | Y        | Z        |
|------|----------|----------|----------|
| C    | -1.30483 | -1.55619 | 0.533442 |
| C    | -0.49225 | -0.59233 | -0.11771 |
| C    | -1.37184 | 0.655913 | -0.05403 |
| C    | -2.65462 | 0.104863 | -0.67293 |
| O    | -2.60626 | -1.37232 | -0.12517 |
| N    | -0.4849  | 1.627164 | -0.62694 |
| C    | 0.813419 | 1.356964 | -0.22908 |
| C    | 0.847015 | -0.09292 | 0.388661 |
| O    | -0.3572  | -0.88122 | -1.16922 |
| C    | -1.61378 | 1.0593   | 1.304153 |
| O    | 1.765264 | 2.108727 | -0.3479  |
| C    | 2.082853 | -0.87964 | -0.05908 |
| H    | 3.371839 | -0.56447 | 0.651071 |
| H    | 2.002831 | -1.70868 | -0.95213 |
| O    | 0.864595 | 0.040153 | 1.47627  |
| H    | -2.60537 | 0.118005 | -1.76421 |
| H    | -3.54554 | 0.643624 | -0.34553 |
| H    | -2.6929  | -2.09794 | -0.93967 |
| H    | -3.37141 | -1.58115 | 0.624439 |
| H    | -0.75082 | 2.589296 | -0.80333 |
| H    | -1.92362 | 0.286247 | 1.80263  |
| H    | 3.563662 | 0.512883 | 0.592292 |
| H    | 4.197447 | -1.12435 | 0.20964  |
| H    | 3.278609 | -0.81725 | 1.714225 |

**Table S66:** Energy minimization of 13S\*, 14R\*, 15S\* furanopyrrolidone (Case IV)

Boltzmann distribution of energy minimized conformer

| Conformer | Calculated Energy (G)<br>(atomic units) | Relative<br>Energy<br>(kcal/mol) | Boltzmann<br>Weights (%) |
|-----------|-----------------------------------------|----------------------------------|--------------------------|
| 1         | -667.033953                             | 0.000000                         | 100.000000               |

Optimized Z-Matrixes of major conformer in the chloroform (Å)

| Atom | X        | Y        | Z        |
|------|----------|----------|----------|
| C    | -0.46787 | -0.3386  | 0.885062 |
| C    | -1.15225 | -0.55566 | -0.49834 |
| C    | -2.63316 | -0.32727 | -0.20011 |
| C    | -2.58132 | 0.724072 | 0.907894 |
| O    | -1.37815 | 0.436927 | 1.663633 |
| N    | -0.56502 | 0.526408 | -1.28698 |
| C    | 0.528804 | 1.13535  | -0.7574  |
| C    | 0.827742 | 0.437601 | 0.588412 |
| O    | 2.020104 | -0.4938  | 0.360249 |
| C    | 3.37486  | -0.00786 | 0.785625 |
| O    | 1.844381 | -1.58301 | -0.17816 |
| C    | 1.048898 | 1.185025 | 1.352643 |
| H    | 1.176202 | 2.047524 | -1.25803 |
| H    | -0.28172 | -1.29229 | 1.386545 |
| O    | -0.93518 | -1.8161  | -1.07959 |
| H    | -3.05944 | -1.2663  | 0.163607 |
| H    | -3.19668 | -0.00075 | -1.0781  |
| H    | -3.42616 | 0.671247 | 1.598064 |
| H    | -2.51877 | 1.740793 | 0.50098  |
| H    | -0.89627 | 0.764072 | -2.21444 |
| H    | 3.568737 | 0.971271 | 0.331696 |
| H    | 4.148478 | -0.72016 | 0.496685 |
| H    | 3.387437 | 0.139667 | 1.872182 |
| H    | 0.021129 | -2.00318 | -1.01219 |

**Table S7:** Optical rotation calculation of *R*-solanol

Boltzmann distribution of energy minimized conformers

| Conformer | Calculated Energy (G) (atomic units) | Relative Energy (kcal/mol) | Boltzmann Weights (%) |
|-----------|--------------------------------------|----------------------------|-----------------------|
| 1         | -1032.926729                         | 0.000000                   | 0.000000000           |
| 2         | -1032.934535                         | -4.898339                  | 5.879042322           |
| 3         | -1032.926582                         | 0.092244                   | 0.000000000           |
| 4         | -1032.923683                         | 1.911394                   | 0.000000000           |
| 5         | -1032.935154                         | -5.286768                  | 94.036363748          |
| 6         | -1032.933588                         | -4.304088                  | 0.084593930           |
| 7         | -1032.926293                         | 0.273594                   | 0.000000000           |
| 8         | -1032.925225                         | 0.943774                   | 0.000000000           |
| 9         | -1032.925172                         | 0.977032                   | 0.000000000           |

Specific rotation of *R*-solanol [ $\text{deg} \times \text{dm}^{-1} \times (\text{g}/100 \text{ mL})^{-1}$ ]: + **6.754**Optimized Z-matrixes of *R*-solanol conformers in the MeOH ( $\text{\AA}$ )

| Atom | Conformer 1 |          |          | Conformer 2 |          |          | Conformer 3 |          |          |
|------|-------------|----------|----------|-------------|----------|----------|-------------|----------|----------|
|      | X           | Y        | Z        | X           | Y        | Z        | X           | Y        | Z        |
| C    | -3.31292    | 0.879007 | 0.188727 | -3.32512    | 0.570182 | 0.198108 | 3.295143    | 0.952867 | 0.341526 |
| C    | -3.17878    | -0.45869 | 0.018631 | -3.08618    | -0.75294 | 0.032286 | 3.230319    | -0.39534 | 0.221385 |
| C    | -1.83248    | -1.05249 | -0.24804 | -1.6969     | -1.26342 | -0.18078 | 1.912829    | -1.071   | 0.012359 |
| C    | -0.6901     | -0.15827 | -0.24402 | -0.61998    | -0.2931  | -0.20344 | 0.740803    | -0.22871 | -0.12766 |
| C    | -0.85406    | 1.233331 | -0.03301 | -0.88241    | 1.086569 | -0.02384 | 0.839809    | 1.181739 | -0.0303  |
| C    | -2.1866     | 1.785646 | 0.174875 | -2.25381    | 1.546107 | 0.179165 | 2.132844    | 1.804576 | 0.222834 |
| C    | 0.596813    | -0.66708 | -0.46066 | 0.698058    | -0.71806 | -0.39762 | -0.51418    | -0.80962 | -0.3543  |
| C    | 1.740895    | 0.181719 | -0.45961 | 1.775914    | 0.203003 | -0.42323 | -1.68692    | -0.01084 | -0.50805 |
| C    | 1.57651     | 1.538838 | -0.23537 | 1.519286    | 1.553839 | -0.23098 | -1.58329    | 1.368618 | -0.41338 |
| C    | 0.264551    | 2.062444 | -0.03114 | 0.177007    | 1.994461 | -0.0376  | -0.30518    | 1.960539 | -0.17251 |
| C    | 2.709916    | 2.525016 | -0.19596 | 2.619811    | 2.581546 | -0.23958 | -2.74302    | 2.314266 | -0.56052 |
| C    | 3.086472    | -0.45483 | -0.71445 | 3.175367    | -0.31371 | -0.67689 | -2.98604    | -0.73501 | -0.76638 |
| C    | 3.813082    | -0.93636 | 0.556795 | 3.915184    | -0.83936 | 0.570798 | -3.65592    | -1.29912 | 0.504431 |
| C    | 5.128935    | -1.62577 | 0.214158 | 5.404901    | -1.00383 | 0.307866 | -4.93269    | -2.05038 | 0.169136 |
| O    | -4.29165    | -1.20177 | 0.006984 | -3.99196    | -1.72633 | 0.034578 | 4.36014     | -1.09337 | 0.388164 |
| C    | -4.31612    | -2.59591 | 0.397861 | -5.372      | -1.37642 | 0.232021 | 4.598045    | -2.37046 | -0.25191 |
| O    | -2.36072    | 3.014446 | 0.355257 | -2.51205    | 2.761419 | 0.336907 | 2.247998    | 3.050003 | 0.318081 |
| O    | -1.71977    | -2.26922 | -0.48428 | -1.50435    | -2.48071 | -0.32894 | 1.843155    | -2.31355 | -0.01465 |
| O    | 0.1509      | 3.38454  | 0.161687 | -0.03821    | 3.308952 | 0.126431 | -0.25058    | 3.297606 | -0.08922 |
| O    | 0.795854    | -1.97784 | -0.67878 | 0.988734    | -2.02476 | -0.56032 | -0.65852    | -2.13822 | -0.4419  |
| O    | 2.97922     | -1.78599 | 1.358994 | 3.403748    | -2.1075  | 1.014965 | -4.01651    | -0.25167 | 1.420493 |
| H    | -4.29419    | 1.304938 | 0.356196 | -4.32127    | 0.9599   | 0.35243  | 4.249568    | 1.432731 | 0.518151 |
| H    | 2.701985    | 3.06894  | 0.751419 | 2.260987    | 3.536767 | 0.133631 | -2.76663    | 3.01358  | 0.277497 |
| H    | 3.681585    | 2.054615 | -0.31021 | 3.464773    | 2.267138 | 0.373228 | -2.62647    | 2.918307 | -1.46507 |
| H    | 2.591612    | 3.273873 | -0.98352 | 2.994157    | 2.739606 | -1.2558  | -3.69762    | 1.801237 | -0.60308 |
| H    | 3.741093    | 0.241891 | -1.23748 | 3.776097    | 0.48434  | -1.11086 | -2.78923    | -1.57592 | -1.43405 |
| H    | 2.953928    | -1.31113 | -1.37927 | 3.141972    | -1.11809 | -1.41624 | -3.69691    | -0.08283 | -1.27204 |
| H    | 4.015843    | -0.07359 | 1.196925 | 3.777044    | -0.11865 | 1.386203 | -2.95537    | -1.97812 | 1.000675 |
| H    | 5.798411    | -0.94601 | -0.31889 | 5.870969    | -0.038   | 0.100635 | -4.72202    | -2.8814  | -0.50637 |
| H    | 5.628934    | -1.95466 | 1.126713 | 5.891892    | -1.43804 | 1.183102 | -5.38723    | -2.45056 | 1.076911 |
| H    | 4.953855    | -2.50029 | -0.41865 | 5.575729    | -1.66563 | -0.54504 | -5.6532     | -1.38592 | -0.31467 |
| H    | -3.66266    | -2.77103 | 1.249975 | -5.71289    | -0.71232 | -0.56358 | 4.198681    | -2.37632 | -1.26413 |
| H    | -4.02739    | -3.23252 | -0.4334  | -5.5075     | -0.90126 | 1.204706 | 4.16146     | -3.1779  | 0.328585 |
| H    | -5.35047    | -2.77996 | 0.678558 | -5.91746    | -2.31443 | 0.195171 | 5.681292    | -2.4621  | -0.27967 |
| H    | -0.82622    | 3.558879 | 0.280327 | -1.02507    | 3.410802 | 0.24477  | 0.708802    | 3.520081 | 0.084488 |
| H    | -0.1035     | -2.40627 | -0.66504 | 0.122988    | -2.51742 | -0.50829 | 0.244638    | -2.53053 | -0.29708 |
| H    | 2.489749    | -2.38074 | 0.774732 | 2.545549    | -2.27255 | 0.599082 | -3.21053    | 0.136502 | 1.781947 |



**Table S7:** (continued)Optimized Z-matrixes of *R*-solaniol conformers in the MeOH (Å)

| Atom | Conformer 4 |          |          | Conformer 5 |          |          | Conformer 6 |          |          |
|------|-------------|----------|----------|-------------|----------|----------|-------------|----------|----------|
|      | X           | Y        | Z        | X           | Y        | Z        | X           | Y        | Z        |
| C    | 3.184822    | 1.009027 | 0.37541  | 3.309853    | 0.622734 | 0.2154   | 3.180808    | 0.761913 | 0.270625 |
| C    | 3.125176    | -0.33454 | 0.211863 | 3.12467     | -0.71348 | 0.086098 | 3.062468    | -0.57445 | 0.080441 |
| C    | 1.810658    | -1.00261 | -0.03225 | 1.761928    | -1.2863  | -0.14299 | 1.734228    | -1.19867 | -0.2078  |
| C    | 0.63621     | -0.1569  | -0.1556  | 0.650168    | -0.36272 | -0.21516 | 0.580824    | -0.32491 | -0.2683  |
| C    | 0.729716    | 1.247444 | -0.01046 | 0.857972    | 1.033086 | -0.0786  | 0.719585    | 1.070947 | -0.06853 |
| C    | 2.021468    | 1.862109 | 0.274004 | 2.203266    | 1.554641 | 0.138147 | 2.033158    | 1.644169 | 0.205751 |
| C    | -0.61424    | -0.73247 | -0.40971 | -0.64772    | -0.84519 | -0.42463 | -0.68752    | -0.85645 | -0.52458 |
| C    | -1.78546    | 0.059695 | -0.54459 | -1.76472    | 0.038215 | -0.50143 | -1.84479    | -0.02802 | -0.58904 |
| C    | -1.68709    | 1.438543 | -0.41019 | -1.55749    | 1.402865 | -0.36265 | -1.701      | 1.340434 | -0.41129 |
| C    | -0.41754    | 2.030186 | -0.13687 | -0.23224    | 1.89527  | -0.15566 | -0.40794    | 1.883836 | -0.14256 |
| C    | -2.87494    | 2.351462 | -0.56665 | -2.65091    | 2.432856 | -0.43117 | -2.83172    | 2.327399 | -0.49094 |
| C    | -3.09712    | -0.61997 | -0.88447 | -3.12069    | -0.58254 | -0.73551 | -3.16492    | -0.70343 | -0.88616 |
| C    | -3.83026    | -1.38847 | 0.246392 | -3.77631    | -1.15831 | 0.537406 | -3.91225    | -1.30217 | 0.329442 |
| C    | -3.89724    | -0.64078 | 1.573735 | -5.11641    | -1.80195 | 0.226392 | -4.43305    | -0.273   | 1.318884 |
| O    | 4.254053    | -1.03534 | 0.366379 | 4.068661    | -1.64933 | 0.140624 | 4.047741    | -1.46715 | 0.118681 |
| C    | 4.497255    | -2.29897 | -0.29826 | 5.427441    | -1.23803 | 0.36175  | 5.380736    | -1.0037  | 0.38941  |
| O    | 2.135189    | 3.102757 | 0.411322 | 2.409276    | 2.785373 | 0.256736 | 2.177313    | 2.876097 | 0.382711 |
| O    | 1.740598    | -2.24272 | -0.10186 | 1.624016    | -2.51547 | -0.2618  | 1.656783    | -2.42603 | -0.38365 |
| O    | -0.35616    | 3.364044 | -0.00944 | -0.08009    | 3.222962 | -0.03857 | -0.32302    | 3.210809 | 0.034354 |
| O    | -0.74376    | -2.06667 | -0.54098 | -0.88367    | -2.15651 | -0.56665 | -0.8492     | -2.17665 | -0.73026 |
| O    | -3.30749    | -2.71067 | 0.442645 | -4.02218    | -0.13291 | 1.514442 | -3.09669    | -2.21914 | 1.073023 |
| H    | 4.135918    | 1.485734 | 0.576418 | 4.28673     | 1.054964 | 0.379853 | 4.131947    | 1.231404 | 0.477807 |
| H    | -2.64184    | 3.352121 | -0.21363 | -2.52256    | 3.063299 | -1.31582 | -2.97198    | 2.823641 | 0.47292  |
| H    | -3.16507    | 2.429124 | -1.6191  | -3.64081    | 1.99047  | -0.45771 | -2.59386    | 3.113116 | -1.21133 |
| H    | -3.74059    | 1.985781 | -0.01616 | -2.59551    | 3.097919 | 0.432876 | -3.773      | 1.869306 | -0.77592 |
| H    | -2.92833    | -1.32938 | -1.69901 | -3.00965    | -1.40321 | -1.44686 | -2.98268    | -1.51474 | -1.59392 |
| H    | -3.78896    | 0.12738  | -1.26857 | -3.80431    | 0.138779 | -1.18119 | -3.84537    | -0.01391 | -1.38431 |
| H    | -4.85082    | -1.54458 | -0.11395 | -3.1064     | -1.90747 | 0.971124 | -4.76778    | -1.85011 | -0.08581 |
| H    | -4.40765    | 0.31883  | 1.461492 | -4.99378    | -2.61232 | -0.49445 | -5.14958    | 0.397853 | 0.841415 |
| H    | -4.4547     | -1.23588 | 2.298968 | -5.56042    | -2.21271 | 1.13464  | -4.94037    | -0.78071 | 2.141574 |
| H    | -2.89937    | -0.45551 | 1.978095 | -5.80703    | -1.0667  | -0.19449 | -3.61784    | 0.321029 | 1.737253 |
| H    | 4.108253    | -2.28305 | -1.31433 | 5.518537    | -0.72882 | 1.322447 | 5.426534    | -0.53172 | 1.372052 |
| H    | 4.054298    | -3.11788 | 0.261026 | 5.762975    | -0.58434 | -0.44476 | 5.70302     | -0.30207 | -0.38143 |
| H    | 5.580573    | -2.39084 | -0.31651 | 6.01106     | -2.15356 | 0.367633 | 6.006038    | -1.89109 | 0.371807 |
| H    | 0.60229     | 3.576549 | 0.180952 | 0.898123    | 3.372575 | 0.10048  | 0.642254    | 3.400649 | 0.207912 |
| H    | 0.164072    | -2.45687 | -0.3955  | -0.00224    | -2.61224 | -0.4888  | 0.055521    | -2.58922 | -0.64892 |
| H    | -2.35605    | -2.69524 | 0.261114 | -3.17568    | 0.18357  | 1.852489 | -2.47789    | -2.6503  | 0.467856 |

**Table S7:** (continued)Optimized Z-matrixes of *R*-solaniol conformers in the MeOH (Å)

| Atom | Conformer 7 |           |           | Conformer 8 |           |           | Conformer 9 |           |           |
|------|-------------|-----------|-----------|-------------|-----------|-----------|-------------|-----------|-----------|
|      | X           | Y         | Z         | X           | Y         | Z         | X           | Y         | Z         |
| C    | 3.309198    | 0.934309  | 0.342013  | -3.317015   | 0.915052  | 0.213364  | -3.293073   | 0.934601  | 0.36112   |
| C    | 3.232128    | -0.41285  | 0.222158  | -3.2164     | -0.428597 | 0.072633  | -3.214228   | -0.411415 | 0.229159  |
| C    | 1.907961    | -1.075568 | 0.016278  | -1.890204   | -1.057344 | -0.21134  | -1.890607   | -1.068841 | 0.005268  |
| C    | 0.743431    | -0.222554 | -0.118742 | -0.727226   | -0.190387 | -0.240902 | -0.728246   | -0.211484 | -0.131583 |
| C    | 0.854059    | 1.186927  | -0.023051 | -0.854121   | 1.209207  | -0.06291  | -0.841375   | 1.196386  | -0.024057 |
| C    | 2.154045    | 1.796435  | 0.225323  | -2.171412   | 1.795104  | 0.153386  | -2.14106    | 1.800253  | 0.242308  |
| C    | -0.517915   | -0.79303  | -0.34245  | 0.54406     | -0.736365 | -0.466052 | 0.532673    | -0.77788  | -0.365045 |
| C    | -1.678657   | 0.017364  | -0.488463 | 1.706052    | 0.085892  | -0.489626 | 1.69197     | 0.036087  | -0.509295 |
| C    | -1.566035   | 1.395486  | -0.400351 | 1.576638    | 1.456937  | -0.327374 | 1.572264    | 1.415666  | -0.433558 |
| C    | -0.284871   | 1.979559  | -0.165096 | 0.281485    | 2.017895  | -0.112984 | 0.29305     | 1.994198  | -0.17457  |
| C    | -2.753689   | 2.307661  | -0.555523 | 2.760981    | 2.385946  | -0.39038  | 2.750612    | 2.335189  | -0.622239 |
| C    | -2.99177    | -0.678162 | -0.755373 | 3.036387    | -0.586835 | -0.727025 | 3.008897    | -0.658774 | -0.757233 |
| C    | -3.657992   | -1.279488 | 0.489998  | 3.584162    | -1.376437 | 0.484552  | 3.618742    | -1.345082 | 0.487511  |
| C    | -4.895989   | -2.089925 | 0.126552  | 4.005249    | -0.498352 | 1.649408  | 4.090107    | -0.374079 | 1.555325  |
| O    | 4.355883    | -1.122038 | 0.386695  | -4.344734   | -1.147924 | 0.101161  | -4.33469    | -1.124067 | 0.397443  |
| C    | 4.582137    | -2.396558 | -0.262199 | -4.387686   | -2.526833 | 0.541361  | -4.562901   | -2.397101 | -0.253864 |
| O    | 2.284312    | 3.04101   | 0.318595  | -2.318419   | 3.032145  | 0.301529  | -2.272945   | 3.043364  | 0.348501  |
| O    | 1.827284    | -2.317732 | -0.012642 | -1.81132    | -2.279228 | -0.433928 | -1.80663    | -2.309855 | -0.036751 |
| O    | -0.206032   | 3.316593  | -0.084974 | 0.184534    | 3.347413  | 0.038412  | 0.210002    | 3.32973   | -0.079488 |
| O    | -0.674842   | -2.120767 | -0.434382 | 0.711596    | -2.04879  | -0.677274 | 0.692003    | -2.103859 | -0.471078 |
| O    | -3.993349   | -0.184522 | 1.361689  | 4.751247    | -2.114958 | 0.086576  | 4.769653    | -2.111239 | 0.094808  |
| H    | 4.268032    | 1.406251  | 0.516036  | -4.28455    | 1.367871  | 0.389915  | -4.251327   | 1.402855  | 0.547649  |
| H    | -2.522161   | 3.308358  | -0.199873 | 2.455143    | 3.415791  | -0.231087 | 2.435869    | 3.374648  | -0.613759 |
| H    | -3.041645   | 2.389395  | -1.608685 | 3.506695    | 2.130624  | 0.363926  | 3.490595    | 2.199097  | 0.168927  |
| H    | -3.610786   | 1.92558   | -0.004065 | 3.251479    | 2.323717  | -1.365073 | 3.251998    | 2.136745  | -1.571825 |
| H    | -2.817595   | -1.494912 | -1.458108 | 3.788455    | 0.139294  | -1.033297 | 3.744381    | 0.036823  | -1.159462 |
| H    | -3.696378   | 0.006996  | -1.226875 | 2.917429    | -1.296231 | -1.550463 | 2.850137    | -1.43472  | -1.510968 |
| H    | -2.937141   | -1.927635 | 0.998537  | 2.816727    | -2.079508 | 0.820968  | 2.872625    | -2.019844 | 0.916862  |
| H    | -4.628972   | -2.941443 | -0.503786 | 3.166065    | 0.099223  | 2.0095    | 3.264475    | 0.245283  | 1.9098    |
| H    | -5.377579   | -2.478121 | 1.027394  | 4.3607      | -1.116295 | 2.475747  | 4.492902    | -0.922431 | 2.408585  |
| H    | -5.618716   | -1.47094  | -0.41086  | 4.812707    | 0.175019  | 1.351683  | 4.874572    | 0.278181  | 1.16404   |
| H    | 4.181417    | -2.392249 | -1.273974 | -3.719284   | -2.684652 | 1.385407  | -4.111775   | -3.205294 | 0.314361  |
| H    | 4.139332    | -3.204314 | 0.313144  | -4.128977   | -3.197667 | -0.272637 | -4.171996   | -2.387687 | -1.269399 |
| H    | 5.66453     | -2.497543 | -0.292311 | -5.418819   | -2.680821 | 0.850603  | -5.645159   | -2.501483 | -0.27353  |
| H    | 0.757754    | 3.522332  | 0.088242  | -0.789073   | 3.535729  | 0.173464  | -0.753159   | 3.530218  | 0.104871  |
| H    | 0.224839    | -2.521284 | -0.293114 | -0.194714   | -2.457671 | -0.647468 | -0.205846   | -2.508326 | -0.329414 |
| H    | -4.347232   | -0.548456 | 2.182014  | 4.4911      | -2.772993 | -0.56966  | 4.481608    | -2.823018 | -0.48969  |

**Table S8:** Optical rotation calculation of *S*-solaniol

Boltzmann distribution of energy minimized conformers

| Conformer | Calculated Energy (G)<br>(atomic units) | Relative Energy<br>(kcal/mol) | Boltzmann Weights (%) |
|-----------|-----------------------------------------|-------------------------------|-----------------------|
| 1         | -1032.926729                            | 0.000000                      | 0.000000000           |
| 2         | -1032.934535                            | -4.898339                     | 5.879042322           |
| 3         | -1032.926582                            | 0.092244                      | 0.000000000           |
| 4         | -1032.923683                            | 1.911394                      | 0.000000000           |
| 5         | -1032.935154                            | -5.286768                     | 94.036363748          |
| 6         | -1032.933588                            | -4.304088                     | 0.084593930           |
| 7         | -1032.926293                            | 0.273594                      | 0.000000000           |
| 8         | -1032.925172                            | 0.977032                      | 0.000000000           |

Specific rotation of *S*-solaniol [ $\text{deg} \times \text{dm}^{-1} \times (\text{g}/100 \text{ mL})^{-1}$ ] :- **6.754**Optimized Z-matrixes of *S*-solaniol conformers in the MeOH ( $\text{Å}$ )

| Atom | Conformer 1 |           |           | Conformer 2 |           |           | Conformer 3 |           |           |
|------|-------------|-----------|-----------|-------------|-----------|-----------|-------------|-----------|-----------|
|      | X           | Y         | Z         | X           | Y         | Z         | X           | Y         | Z         |
| C    | 3.31288     | 0.87905   | 0.188742  | 3.325123    | 0.570182  | 0.198108  | -3.295144   | 0.952867  | 0.341525  |
| C    | 3.178752    | -0.458654 | 0.01866   | 3.086183    | -0.752941 | 0.032286  | -3.230319   | -0.395344 | 0.221386  |
| C    | 1.832413    | -1.052489 | -0.247898 | 1.696902    | -1.263416 | -0.180778 | -1.91283    | -1.071001 | 0.012361  |
| C    | 0.690039    | -0.158253 | -0.243877 | 0.619975    | -0.293103 | -0.203436 | -0.740804   | -0.228708 | -0.12766  |
| C    | 0.854007    | 1.233347  | -0.032879 | 0.882406    | 1.086569  | -0.023843 | -0.83981    | 1.181739  | -0.030299 |
| C    | 2.186549    | 1.785651  | 0.175009  | 2.253814    | 1.546107  | 0.179165  | -2.132845   | 1.804576  | 0.222833  |
| C    | -0.596858   | -0.667063 | -0.460528 | -0.698058   | -0.718058 | -0.397616 | 0.514183    | -0.809623 | -0.354299 |
| C    | -1.74094    | 0.181732  | -0.4596   | -1.775914   | 0.203003  | -0.423227 | 1.686919    | -0.010839 | -0.508047 |
| C    | -1.576561   | 1.538867  | -0.235463 | -1.519286   | 1.553839  | -0.230983 | 1.583288    | 1.368617  | -0.413378 |
| C    | -0.264607   | 2.062468  | -0.031067 | -0.177007   | 1.994461  | -0.037596 | 0.305182    | 1.960538  | -0.172506 |
| C    | -2.709949   | 2.525104  | -0.196506 | -2.619811   | 2.581546  | -0.239576 | 2.743021    | 2.314266  | -0.560515 |
| C    | -3.086474   | -0.454837 | -0.714496 | -3.175367   | -0.313706 | -0.676887 | 2.986034    | -0.735013 | -0.766374 |
| C    | -3.812989   | -0.936441 | 0.556804  | -3.915184   | -0.839355 | 0.570798  | 3.655921    | -1.299122 | 0.504431  |
| C    | -5.128775   | -1.626011 | 0.214238  | -5.404901   | -1.003834 | 0.307866  | 4.932694    | -2.050376 | 0.169133  |
| O    | 4.291633    | -1.20168  | 0.006896  | 3.991962    | -1.726327 | 0.034578  | -4.360141   | -1.093365 | 0.388164  |
| C    | 4.316259    | -2.595949 | 0.397276  | 5.371996    | -1.376418 | 0.232021  | -4.598044   | -2.370456 | -0.251909 |
| O    | 2.36065     | 3.014452  | 0.355467  | 2.512054    | 2.761419  | 0.336908  | -2.248      | 3.050003  | 0.31808   |
| O    | 1.719697    | -2.269214 | -0.484053 | 1.504346    | -2.480708 | -0.328935 | -1.843156   | -2.31355  | -0.014642 |
| O    | -0.150943   | 3.384561  | 0.161797  | 0.038213    | 3.308952  | 0.126431  | 0.250581    | 3.297606  | -0.089222 |
| O    | -0.795924   | -1.977851 | -0.678491 | -0.988734   | -2.024761 | -0.560316 | 0.658522    | -2.138217 | -0.441891 |
| O    | -2.979028   | -1.785984 | 1.358986  | -3.403748   | -2.107502 | 1.014965  | 4.016512    | -0.251672 | 1.42049   |
| H    | 4.294151    | 1.305001  | 0.356128  | 4.321268    | 0.9599    | 0.35243   | -4.249569   | 1.432732  | 0.518149  |
| H    | -3.681603   | 2.054697  | -0.310823 | -3.464773   | 2.267138  | 0.373228  | 2.626468    | 2.918308  | -1.465063 |
| H    | -2.591437   | 3.273683  | -0.984313 | -2.994157   | 2.739606  | -1.255796 | 3.69762     | 1.801236  | -0.603082 |
| H    | -2.702184   | 3.069376  | 0.750662  | -2.260987   | 3.536767  | 0.13363   | 2.766629    | 3.013578  | 0.277499  |
| H    | -2.953954   | -1.311105 | -1.379358 | -3.141972   | -1.118088 | -1.416235 | 3.696908    | -0.08283  | -1.272042 |
| H    | -3.74118    | 0.241882  | -1.237412 | -3.776097   | 0.48434   | -1.110861 | 2.789223    | -1.575924 | -1.434047 |
| H    | -4.015802   | -0.073654 | 1.196898  | -3.777044   | -0.118653 | 1.386203  | 2.955368    | -1.978119 | 1.000677  |
| H    | -4.953586   | -2.500592 | -0.418451 | -5.575729   | -1.665627 | -0.545044 | 5.653196    | -1.385922 | -0.314675 |
| H    | -5.628771   | -1.954842 | 1.126818  | -5.891892   | -1.438042 | 1.183102  | 5.387229    | -2.450559 | 1.076907  |
| H    | -5.798318   | -0.946382 | -0.318897 | -5.870969   | -0.037996 | 0.100635  | 4.722022    | -2.881396 | -0.506369 |
| H    | 4.027517    | -3.232289 | -0.434189 | 5.5075      | -0.901257 | 1.204706  | -4.16146    | -3.177896 | 0.328582  |
| H    | 3.662892    | -2.771443 | 1.249387  | 5.712888    | -0.712324 | -0.563579 | -4.198677   | -2.37632  | -1.264136 |
| H    | 5.350661    | -2.779982 | 0.677807  | 5.917463    | -2.314426 | 0.195171  | -5.681291   | -2.4621   | -0.279674 |
| H    | 0.826176    | 3.558876  | 0.28048   | 1.025065    | 3.410802  | 0.24477   | -0.708804   | 3.520079  | 0.084486  |
| H    | 0.103413    | -2.406264 | -0.664722 | -0.122988   | -2.517422 | -0.508289 | -0.244637   | -2.530527 | -0.297076 |
| H    | -2.48915    | -2.380362 | 0.774683  | -2.545549   | -2.272553 | 0.599082  | 3.210539    | 0.136506  | 1.781944  |

**Table S8:** (continued)Optimized Z-matrixes of *S*-solaniol conformers in the MeOH (Å)

| Atom | Conformer 4 |           |           | Conformer 5 |          |          | Conformer 6 |           |           |
|------|-------------|-----------|-----------|-------------|----------|----------|-------------|-----------|-----------|
|      | X           | Y         | Z         | X           | Y        | Z        | X           | Y         | Z         |
| C    | -3.184822   | 1.009027  | 0.37541   | -3.30985    | 0.622734 | 0.2154   | -3.180781   | 0.761901  | 0.270675  |
| C    | -3.125176   | -0.334542 | 0.211863  | -3.12467    | -0.71348 | 0.086098 | -3.062447   | -0.574456 | 0.080456  |
| C    | -1.810658   | -1.002609 | -0.032252 | -1.76193    | -1.2863  | -0.14299 | -1.73423    | -1.198657 | -0.207865 |
| C    | -0.63621    | -0.1569   | -0.155595 | -0.65017    | -0.36272 | -0.21516 | -0.580817   | -0.3249   | -0.268333 |
| C    | -0.729716   | 1.247444  | -0.010461 | -0.85797    | 1.033086 | -0.0786  | -0.719567   | 1.070955  | -0.068533 |
| C    | -2.021468   | 1.862109  | 0.274004  | -2.20327    | 1.554641 | 0.138147 | -2.033135   | 1.644165  | 0.205781  |
| C    | 0.614235    | -0.732469 | -0.409714 | 0.647715    | -0.84519 | -0.42463 | 0.687528    | -0.856435 | -0.524637 |
| C    | 1.785458    | 0.059695  | -0.544589 | 1.76472     | 0.038215 | -0.50143 | 1.844804    | -0.028004 | -0.589001 |
| C    | 1.687086    | 1.438543  | -0.410192 | 1.557488    | 1.402865 | -0.36265 | 1.701033    | 1.340443  | -0.411213 |
| C    | 0.417537    | 2.030186  | -0.136871 | 0.232238    | 1.89527  | -0.15566 | 0.407961    | 1.88385   | -0.142555 |
| C    | 2.874938    | 2.351462  | -0.566645 | 2.650907    | 2.432856 | -0.43117 | 2.831768    | 2.327387  | -0.490874 |
| C    | 3.09712     | -0.619968 | -0.884474 | 3.120694    | -0.58254 | -0.73551 | 3.164903    | -0.703458 | -0.886146 |
| C    | 3.830264    | -1.388471 | 0.246392  | 3.776312    | -1.15831 | 0.537406 | 3.912126    | -1.302338 | 0.32947   |
| C    | 3.897243    | -0.640776 | 1.573735  | 5.116414    | -1.80195 | 0.226392 | 4.433293    | -0.27321  | 1.318764  |
| O    | -4.254053   | -1.035338 | 0.366379  | -4.06866    | -1.64933 | 0.140624 | -4.047722   | -1.467144 | 0.118718  |
| C    | -4.497255   | -2.298973 | -0.29826  | -5.42744    | -1.23803 | 0.36175  | -5.380686   | -1.00366  | 0.389482  |
| O    | -2.135189   | 3.102757  | 0.411322  | -2.40928    | 2.785373 | 0.256736 | -2.177314   | 2.876096  | 0.382695  |
| O    | -1.740598   | -2.242723 | -0.101855 | -1.62402    | -2.51547 | -0.2618  | -1.656809   | -2.426015 | -0.383788 |
| O    | 0.356157    | 3.364044  | -0.009439 | 0.08009     | 3.222962 | -0.03857 | 0.323029    | 3.210833  | 0.034283  |
| O    | 0.743764    | -2.066674 | -0.54098  | 0.883673    | -2.15651 | -0.56665 | 0.849205    | -2.176619 | -0.730419 |
| O    | 3.307492    | -2.71067  | 0.442645  | 4.02218     | -0.13291 | 1.514442 | 3.096313    | -2.218851 | 1.073278  |
| H    | -4.135918   | 1.485734  | 0.576418  | -4.28673    | 1.054964 | 0.379853 | -4.131915   | 1.231388  | 0.4779    |
| H    | 3.740591    | 1.985781  | -0.016156 | 3.640812    | 1.990471 | -0.45771 | 2.593945    | 3.113047  | -1.211348 |
| H    | 2.641836    | 3.352121  | -0.213633 | 2.595514    | 3.097919 | 0.432876 | 3.773045    | 1.869248  | -0.775798 |
| H    | 3.165069    | 2.429124  | -1.6191   | 2.522554    | 3.063299 | -1.31582 | 2.971992    | 2.823718  | 0.472941  |
| H    | 3.788956    | 0.12738   | -1.268565 | 3.804305    | 0.138779 | -1.18119 | 3.845459    | -0.014008 | -1.384233 |
| H    | 2.928327    | -1.329377 | -1.699014 | 3.00965     | -1.40321 | -1.44686 | 2.982598    | -1.514708 | -1.593965 |
| H    | 4.850821    | -1.544583 | -0.113953 | 3.106401    | -1.90747 | 0.971124 | 4.76748     | -1.850568 | -0.085794 |
| H    | 2.899368    | -0.455513 | 1.978095  | 5.807029    | -1.0667  | -0.19449 | 3.618272    | 0.321099  | 1.73711   |
| H    | 4.4547      | -1.235876 | 2.298968  | 5.560416    | -2.21271 | 1.13464  | 4.940519    | -0.780961 | 2.141488  |
| H    | 4.407645    | 0.31883   | 1.461492  | 4.993775    | -2.61232 | -0.49445 | 5.150002    | 0.397355  | 0.841165  |
| H    | -4.054298   | -3.117881 | 0.261026  | -5.76298    | -0.58434 | -0.44476 | -5.702961   | -0.301975 | -0.381315 |
| H    | -4.108253   | -2.283051 | -1.314326 | -5.51854    | -0.72882 | 1.322447 | -5.426464   | -0.531726 | 1.372147  |
| H    | -5.580573   | -2.390838 | -0.316508 | -6.01106    | -2.15356 | 0.367633 | -6.00602    | -1.891031 | 0.371842  |
| H    | -0.60229    | 3.576549  | 0.180952  | -0.89812    | 3.372575 | 0.10048  | -0.642245   | 3.400708  | 0.207811  |
| H    | -0.164072   | -2.456869 | -0.395503 | 0.002235    | -2.61224 | -0.4888  | -0.055534   | -2.589173 | -0.649056 |
| H    | 2.356048    | -2.695237 | 0.261114  | 3.175677    | 0.18357  | 1.852489 | 2.477702    | -2.650311 | 0.46813   |

**Table S8:** (continued)Optimized Z-matrixes of *S*-solaniol conformers in the MeOH (Å)

| Atom | Conformer 7 |           |           | Conformer 8 |           |           |
|------|-------------|-----------|-----------|-------------|-----------|-----------|
|      | X           | Y         | Z         | X           | Y         | Z         |
| C    | -3.309198   | 0.934309  | 0.342012  | 3.293073    | 0.934601  | 0.36112   |
| C    | -3.232128   | -0.41285  | 0.222158  | 3.214228    | -0.411415 | 0.229159  |
| C    | -1.907961   | -1.075568 | 0.016278  | 1.890607    | -1.068841 | 0.005268  |
| C    | -0.743431   | -0.222554 | -0.118742 | 0.728246    | -0.211484 | -0.131584 |
| C    | -0.854059   | 1.186927  | -0.023051 | 0.841375    | 1.196386  | -0.024057 |
| C    | -2.154045   | 1.796435  | 0.225323  | 2.14106     | 1.800253  | 0.242308  |
| C    | 0.517915    | -0.79303  | -0.34245  | -0.532673   | -0.77788  | -0.365045 |
| C    | 1.678657    | 0.017364  | -0.488463 | -1.69197    | 0.036087  | -0.509295 |
| C    | 1.566035    | 1.395486  | -0.400351 | -1.572264   | 1.415666  | -0.433558 |
| C    | 0.284871    | 1.979559  | -0.165096 | -0.29305    | 1.994198  | -0.17457  |
| C    | 2.753689    | 2.307661  | -0.555523 | -2.750612   | 2.335189  | -0.622239 |
| C    | 2.99177     | -0.678162 | -0.755373 | -3.008897   | -0.658774 | -0.757233 |
| C    | 3.657992    | -1.279488 | 0.489998  | -3.618742   | -1.345082 | 0.487511  |
| C    | 4.895989    | -2.089925 | 0.126552  | -4.090107   | -0.374079 | 1.555325  |
| O    | -4.355883   | -1.122038 | 0.386695  | 4.33469     | -1.124067 | 0.397443  |
| C    | -4.582137   | -2.396558 | -0.262199 | 4.562901    | -2.397101 | -0.253864 |
| O    | -2.284312   | 3.04101   | 0.318595  | 2.272945    | 3.043364  | 0.348501  |
| O    | -1.827284   | -2.317732 | -0.012642 | 1.80663     | -2.309855 | -0.036751 |
| O    | 0.206032    | 3.316593  | -0.084974 | -0.210002   | 3.32973   | -0.079488 |
| O    | 0.674842    | -2.120767 | -0.434382 | -0.692003   | -2.103859 | -0.471078 |
| O    | 3.993349    | -0.184522 | 1.361689  | -4.769653   | -2.111239 | 0.094808  |
| H    | -4.268032   | 1.406251  | 0.516036  | 4.251327    | 1.402856  | 0.547649  |
| H    | 3.041645    | 2.389395  | -1.608685 | -3.490595   | 2.199098  | 0.168928  |
| H    | 3.610786    | 1.92558   | -0.004065 | -3.251999   | 2.136745  | -1.571825 |
| H    | 2.522161    | 3.308358  | -0.199873 | -2.435869   | 3.374648  | -0.613759 |
| H    | 3.696378    | 0.006996  | -1.226875 | -2.850137   | -1.43472  | -1.510968 |
| H    | 2.817595    | -1.494912 | -1.458108 | -3.744381   | 0.036823  | -1.159462 |
| H    | 2.937141    | -1.927635 | 0.998537  | -2.872625   | -2.019844 | 0.916862  |
| H    | 5.618716    | -1.47094  | -0.41086  | -4.874572   | 0.278181  | 1.16404   |
| H    | 5.377579    | -2.478121 | 1.027394  | -4.492902   | -0.922431 | 2.408585  |
| H    | 4.628972    | -2.941443 | -0.503786 | -3.264474   | 0.245283  | 1.9098    |
| H    | -4.139332   | -3.204314 | 0.313144  | 4.171996    | -2.387687 | -1.269399 |
| H    | -4.181417   | -2.392249 | -1.273974 | 4.111775    | -3.205294 | 0.314361  |
| H    | -5.66453    | -2.497543 | -0.292311 | 5.645159    | -2.501483 | -0.27353  |
| H    | -0.757754   | 3.522332  | 0.088242  | 0.753159    | 3.530218  | 0.104871  |
| H    | -0.224839   | -2.521284 | -0.293114 | 0.205846    | -2.508326 | -0.329414 |
| H    | 4.347232    | -0.548456 | 2.182014  | -4.481608   | -2.823018 | -0.48969  |
